1        **Coping with oxidative stress in extreme environments: the distinctive roles**  
2        **played by *Acinetobacter* sp. Ver3 superoxide dismutases**

3  
4        Bruno Alejandro Steimbrüch (1), Mariana G. Sartorio (1), Néstor Cortez (1) †, Daniela  
5        Albanesi (2, 3), María-Natalia Lisa (2, 3) \* and Guillermo Daniel Repizo (1) \*

6  
7        (1) Instituto de Biología Molecular y Celular de Rosario (IBR, CONICET),  
8        Departamento de Microbiología, Facultad de Ciencias Bioquímicas y Farmacéuticas,  
9        Universidad Nacional de Rosario, Rosario, Argentina.

10       (2) Instituto de Biología Molecular y Celular de Rosario (IBR, CONICET-UNR),  
11       Ocampo y Esmeralda, Rosario S2002LRK, Argentina.

12       (3) Plataforma de Biología Estructural y Metabolómica (PLABEM), Ocampo y  
13       Esmeralda, Rosario S2002LRK, Argentina.

14       † Deceased on October 17<sup>th</sup> 2019

15  
16       \*Authors for correspondence:

17       Guillermo Daniel Repizo, Instituto de Biología Molecular y Celular de Rosario (UNR &  
18       CONICET), Facultad de Ciencias Bioquímicas y Farmacéuticas, Universidad Nacional  
19       de Rosario, Suipacha 531, S2002LRK, Rosario, Argentina. Tel.: +54 341 435  
20       0596/435 0661/435 1235 ext 140; e-mail: [repizo@ibr-conicet.gov.ar](mailto:repizo@ibr-conicet.gov.ar)

21       María-Natalia Lisa, Instituto de Biología Molecular y Celular de Rosario (IBR,  
22       CONICET-UNR), Ocampo y Esmeralda, Rosario S2002LRK, Argentina; Plataforma  
23       de Biología Estructural y Metabolómica (PLABEM), Ocampo y Esmeralda, Rosario  
24       S2002LRK, Argentina; e-mail: [lisa@ibr-conicet.gov.ar](mailto:lisa@ibr-conicet.gov.ar)

25       Running title: *Acinetobacter* sp. Ver3 SODs

26       Keywords: Andean lakes; *Acinetobacter*; UV radiation; oxidative stress; superoxide  
27       dismutase

## 30 ABSTRACT

31 *Acinetobacter sp.* Ver3 is a polyextremophilic strain characterized by a high  
32 tolerance to radiation and pro-oxidants. The Ver3 genome comprises the *sodB* and  
33 *sodC* genes encoding an iron (<sup>AV3</sup>SodB) and a copper/zinc superoxide dismutase  
34 (<sup>AV3</sup>SodC), respectively; however, the specific role(s) of these genes has remained  
35 elusive. We show that the expression of *sodB* remained unaltered in different oxidative  
36 stress conditions whereas *sodC* was up-regulated in the presence of blue light.  
37 Besides, we studied the changes in the in vitro activity of each SOD enzyme in  
38 response to diverse agents and solved the crystal structure of <sup>AV3</sup>SodB at 1.34 Å, one  
39 of the highest resolutions achieved for a SOD. Cell fractionation studies interestingly  
40 revealed that <sup>AV3</sup>SodB is located in the cytosol whereas <sup>AV3</sup>SodC is also found in the  
41 periplasm. Consistently, a bioinformatic analysis of the genomes of 53 *Acinetobacter*  
42 species pointed out the presence of at least one SOD type in each compartment,  
43 suggesting that these enzymes are separately required to cope with oxidative stress.  
44 Surprisingly, <sup>AV3</sup>SodC was found in an active state also in outer membrane vesicles,  
45 probably exerting a protective role. Overall, our multidisciplinary approach highlights  
46 the relevance of SOD enzymes when *Acinetobacter spp.* are confronted with oxidizing  
47 agents.

48

## 49 INTRODUCTION

50 High-altitude Andean lakes (HAALs) along the central Andes area in South  
51 America undergo extreme environmental conditions such as high concentrations of  
52 salts and metalloids, wide daily temperature variations and high exposure to UV  
53 radiation<sup>1</sup>. These ecosystems are thus sources of extremophile microorganisms that  
54 evolved diverse biological strategies to survive hostile environments. Indeed, about  
55 1000 bacterial strains have been isolated from the area to constitute the Extremophile  
56 Culture Collection from HAALs<sup>2,3</sup>.

57 *Acinetobacter sp.* Ver3 and Ver7 are two phylogenetically related strains that  
58 were isolated from Laguna Verde located at 4,400 m above sea level. These strains  
59 are better adapted to survive exposure to UV-B radiation compared to the collection  
60 strains *A. baumannii*, *A. lwoffii* and *A. johnsonii*<sup>4,5</sup> and also display high tolerance to  
61 the chemical pro-oxidants H<sub>2</sub>O<sub>2</sub> and methyl viologen (MV)<sup>5</sup>. Available evidence  
62 indicates that photolyases might be involved in an efficient DNA repair system that  
63 contributes to the UV-B resistance phenotype of the Andean *Acinetobacter* isolates<sup>4,6</sup>.  
64 On the other hand, the high tolerance to pro-oxidants of these strains has led to the  
65 investigation of their catalases and superoxide dismutases (SODs), since they are the  
66 most important enzymes for the elimination of reactive oxygen species (ROS) resulting  
67 from partial reduction of oxygen in aerobic cells. The catalase KatE1 from  
68 *Acinetobacter sp.* Ver3 (<sup>AV3</sup>KatE1) has one of the highest catalytic activities reported  
69 for a catalase<sup>7</sup>. This enzyme is constitutively expressed in high amounts in the

70 bacterial cytosol and acts as the main protecting catalase against H<sub>2</sub>O<sub>2</sub> and UV-B  
71 radiation<sup>5,8</sup>. Instead, <sup>AV3</sup>KatE2 is a periplasmic enzyme that is strongly induced by  
72 peroxide and UV radiation and provides additional protection against pro-oxidants<sup>8</sup>.  
73 H<sub>2</sub>O<sub>2</sub> is formed as a by-product of the respiratory electron transport chain through the  
74 reduction of molecular dioxygen or by disproportionation of the superoxide ion  
75 catalysed by SODs. Relatively little is known about the specific functions of SOD  
76 variants in *Acinetobacter* species.

77 SODs are widely distributed diverse metalloenzymes that are classified  
78 according to the metal cofactor present in the active site. Manganese SODs (MnSODs  
79 or SodA enzymes) and iron SODs (FeSODs or SodB enzymes) are found in the  
80 bacterial cytosol and have very similar active sites, suggesting that these enzymes are  
81 closely related and evolved from a common ancestor, a relation that is supported by  
82 the identification of SOD variants termed cambialistic that use either iron or  
83 manganese (cambialistic Fe/MnSODs) depending on metal availability<sup>9,10</sup>. Early  
84 studies showed that the inactivation of *sodA* and *sodB* in *E. coli* leads to increased  
85 susceptibility to oxidative stress, higher mutation rates and growth defects on minimal  
86 media due to the inactivation by O<sub>2</sub> of enzymes involved in amino acid biosynthesis<sup>11</sup>.  
87 On the other hand, copper-zinc SODs (CuZnSODs or SodC enzymes) belong to a  
88 different lineage and are found in the periplasmic space of gram negative bacteria<sup>12</sup>.  
89 The inability of O<sub>2</sub><sup>-</sup> to cross the cytoplasmic membrane and the subcellular location of  
90 CuZnSODs suggests that periplasmic SODs most likely protect bacteria from  
91 exogenous O<sub>2</sub><sup>-13</sup>. The physiological relevance of these enzymes was emphasized in  
92 studies of the pathogenic bacterium *Salmonella typhimurium*, which produces three  
93 periplasmic CuZnSODs. SodCI, the most relevant isoform for the prevention of  
94 oxidative damage in this species, is found in strains associated with non-typhoid  
95 *Salmonella* bacteremia<sup>14-16</sup> and is necessary for protection against the oxidative burst  
96 of phagocytes and virulence<sup>17,18</sup>.

97 Diverse *sod* genes have been reported to coexist in *Acinetobacter*  
98 genomes<sup>19,20</sup>. For instance, *A. baumannii* ATCC 17978 encodes a gene *sodB* and a  
99 gene *sodC*. A *sodB* mutation in this strain leads to increased susceptibility to oxidative  
100 stress and the antibiotics colistin and tetracycline. Moreover, bacterial motility is  
101 affected and virulence is attenuated<sup>19</sup>. The transcription of *sodC* in the same strain  
102 was up-regulated in the presence of copper and zinc ions. However, the total SOD  
103 activity in exponentially growing cultures remained unchanged even though these  
104 metal ions contribute to bacterial resistance to ROS<sup>20</sup>.

105 To better understand the contributions of different types of SOD enzymes to  
106 resistance to oxidative stress, we conducted a multidisciplinary study of SODs present  
107 in an extremophile *Acinetobacter* species. Thus, we have characterized the enzymes  
108 FeSOD and CuZnSOD from the polyextremophile *Acinetobacter* sp. Ver3 (<sup>AV3</sup>SodB  
109 and <sup>AV3</sup>SodC, respectively) by biochemical and structural methods. Besides, we  
110 present evidence that <sup>AV3</sup>SodB is a cytosolic enzyme whereas <sup>AV3</sup>SodC is directed to

111 the bacterial periplasm. Furthermore, we show that the transcription of *sodC* in this  
112 strain is triggered in response to blue light. Finally, we include a phylogenetic analysis  
113 of *Acinetobacter* SOD enzymes and provide grounds for further studies relevant to  
114 biotechnology and health fields.

115

## 116 **METHODS**

### 117 **Bacterial strains, plasmids, and culture media**

118 Bacterial strains and plasmids used in this work are listed in Table S1. All strains  
119 were grown in Luria Bertani (LB) broth, supplemented with 1.5 % w/v agar for solid  
120 medium when necessary. The antibiotics ampicillin (100 µg/ml), kanamycin (40 µg/ml),  
121 and chloramphenicol (20 µg/ml) were added for selection as required. *E. coli* cells  
122 were grown at 37 °C unless otherwise indicated. *Acinetobacter* strains were grown at  
123 30 °C.

124

### 125 **DNA manipulation procedures**

126 *Acinetobacter* sp. Ver3 genomic DNA was isolated following the CTAB  
127 method<sup>21</sup>. The <sup>AV3</sup>SodB coding sequence was PCR-amplified using primers  
128 FMSOD3228F and FMSOD3228R (Table S2), digested with *Nco*I and *Sac*I and ligated  
129 into the corresponding sites in the previously designed pET3228 expression plasmid<sup>22</sup>,  
130 leading to vector pEV3SodB. The coding sequence for <sup>AV3</sup>SodC devoid of its signal  
131 peptide (<sup>AV3</sup>SodC<sup>-p</sup>) was PCR-amplified using primers CSOD<sup>-p</sup>32F and CSOD<sup>-p</sup>32R,  
132 digested with *Bam*HI and *Xho*I and ligated into the corresponding sites of a modified  
133 version of the plasmid pET32a lacking the enterokinase cleavage site, leading to  
134 vector pEVSodC<sup>-p</sup>. This plasmid allows the production of the recombinant protein as a  
135 translational fusion to thioredoxin and a His<sub>6</sub> tag.

136 All DNA digestions were performed following the enzyme manufacturer's  
137 instructions. Constructions were verified by automated DNA sequencing.

138

### 139 **Protein production and purification**

140 The plasmid pEVSodB was used to transform the SOD-deficient *E. coli* strain  
141 QC774(DE3) and produce recombinant <sup>AV3</sup>SodB as follows. Transformed cells were  
142 grown at 37 °C to an OD<sub>600nm</sub> of 0.6 in LB broth supplemented with ampicillin,  
143 kanamycin and chloramphenicol. Expression of <sup>AV3</sup>SodB was induced by incubation  
144 with 0.05 mM IPTG during 6 h at 180 r.p.m. Cells were harvested (4,000 g at 4 °C, 15  
145 min), resuspended in disruption buffer containing 50 mM Tris-HCl, 0.1 mM EDTA, 50

146 mM NaCl, pH 8.0, supplemented with 0.5 mM phenylmethylsulfonyl fluoride protease  
147 inhibitor (PMSF), 0.5 mM MgCl<sub>2</sub> and 100 µg DNase per liter of culture, and lysed by  
148 sonication. The suspension was cleared by centrifugation at 4 °C and 17,000 g for 30  
149 min and the supernatant was subjected to (NH<sub>4</sub>)<sub>2</sub>SO<sub>4</sub> precipitation at 60 % w/v  
150 saturation. Precipitated proteins were collected by centrifugation (12,000 g at 4 °C, 15  
151 min), the pellet was dissolved in 50 mM Tris-HCl, pH 8.0, and the suspension was  
152 dialyzed against 50 mM Tris-HCl, 50 mM NaCl, pH 8.0. The solution was loaded onto  
153 a Q Sepharose ion-exchange chromatography column (APbiotech) equilibrated with  
154 50 mM Tris-HCl, pH 8.0. The enzyme was eluted by increasing the ionic strength of  
155 the buffer. Purified <sup>AV3</sup>SodB eluted at 100 mM NaCl.

156 *E. coli* QC774(DE3) cells were employed for the production of recombinant  
157 <sup>AV3</sup>SodC devoid of its signal peptide (<sup>AV3</sup>SodC<sup>-p</sup>) using the plasmid pEVSodC<sup>-p</sup>.  
158 Transformed cells were cultured at 37 °C to an OD<sub>600nm</sub> of 0.6 in LB broth  
159 supplemented with ampicillin, kanamycin and chloramphenicol. Protein expression  
160 was induced by incubation with 0.05 mM IPTG during 6 h at 180 r.p.m. Cells were  
161 harvested (4,000 g at 4 °C, 15 min), resuspended in disruption buffer containing 50  
162 mM Tris-HCl, 0.1 mM EDTA, 50 mM NaCl, pH 8.0, supplemented with 0.5 mM PMSF,  
163 0.5 mM MgCl<sub>2</sub> and 100 µg DNase per liter of culture, and lysed by sonication. The  
164 suspension was cleared by centrifugation at 4 °C and 17,000 g for 30 min and the  
165 supernatant was loaded onto a Ni-NTA column (Invitrogen) equilibrated with buffer 50  
166 mM Tris-HCl, 50 mM NaCl, 5 mM imidazole, pH 8.0. After thoroughly washing the  
167 loaded column, the recombinant protein was eluted using the same buffer containing  
168 100 mM imidazole. The thioredoxin and His<sub>6</sub> tags were then removed by cleavage with  
169 thrombin during 3 h at 30 °C. The reaction was stopped by adding 4.4 mM EDTA and  
170 pure <sup>AV3</sup>SodC<sup>-p</sup> was finally obtained after a second step of affinity chromatography  
171 using a Ni-NTA column (Invitrogen).

## 172 **Protein analyses**

173 Protein purification steps and subcellular fractionations were followed by SDS-  
174 PAGE by using the method of Laemmli<sup>23</sup> for 12 % w/v acrylamide gels and Coomassie  
175 blue staining. Protein concentration was determined by the Bradford method<sup>24</sup> using  
176 bovine serum albumin as standard.

177 Antibodies for <sup>AV3</sup>SodB and <sup>AV3</sup>SodC<sup>-p</sup> were obtained by two consecutive  
178 injections of rabbits with 0.3 mg of purified proteins. In each case, the first  
179 subcutaneous injection was carried out with a 1:1 emulsion of the protein with Freund's  
180 complete adjuvant. In the second inoculation, Freund's incomplete adjuvant was used  
181 instead.

182 For immunoblot analysis, proteins were transferred to nitrocellulose  
183 membranes. Alkaline phosphatase-conjugated goat anti-rabbit IgG was employed as  
184 a secondary antibody (Sigma-Aldrich<sup>R</sup>, St. Louis, MI, USA). The antigen-antibody  
185 complex was detected by the alkaline phosphatase reaction, employing 5-bromo-4-

186 chloro-3-indolyl-phosphate (BCIP) and nitro blue tetrazolium (NBT) as substrates  
187 (Roche<sup>R</sup>, Roche Applied Sciences, Indianapolis, IN, USA).

188

### 189 **SOD activity measurements**

190 SOD activity was visualized *in situ* after electrophoresis of cellular lysates or  
191 the purified enzymes in nondenaturing polyacrylamide gels, as previously described<sup>25</sup>.

192 SOD activity was also determined spectrophotometrically by inhibition of the  
193 xanthine/xanthine oxidase-induced reduction of cytochrome *c*<sup>26</sup>, using a Cary WinUV  
194 UV-visible spectrophotometer equipped with a Cary Dual Cell Peltier accessory  
195 (Agilent Technologies, Santa Clara, CA, USA). Reactions were carried out at 25 °C,  
196 in 50 mM sodium phosphate buffer pH 7.8, using 210 pg/ml <sup>AV3</sup>SodB or 930 pg/ml  
197 <sup>AV3</sup>SodC<sup>p</sup>.

198

### 199 **Thermal stability, pH tolerance and response to chemical agents of <sup>AV3</sup>SodB and** 200 **<sup>AV3</sup>SodC**

201 Treatments were applied on 0.5 mg/ml enzyme samples and residual activities  
202 were then measured spectrophotometrically, as described above. In each case, the  
203 activity of the untreated enzyme was defined as 100 %.

204 The thermostability of <sup>AV3</sup>SodB and <sup>AV3</sup>SodC<sup>p</sup> was assessed after heat  
205 treatments in 50 mM sodium phosphate buffer pH 7.8. <sup>AV3</sup>SodB was incubated for 15,  
206 30 or 45 min at 50, 55 or 60 °C. <sup>AV3</sup>SodC<sup>p</sup> was incubated, instead, for 15, 30 or 45  
207 min at 40, 45 or 50 °C.

208 The pH tolerance of <sup>AV3</sup>SodB and <sup>AV3</sup>SodC<sup>p</sup> was determined by incubating the  
209 enzymes in buffers with different pH values at 25 °C for 1 h. The buffer systems  
210 employed were 50 mM citrate (pH 3.0-6.0), Tris-HCl (pH 7.0-8.0), and glycine-NaOH  
211 (pH 9.0-12.0).

212 The effects of ethylenediaminetetraacetic acid (EDTA) and β-mercaptoethanol  
213 (BME) on SOD activity were determined at final concentrations of 1 mM or 10 mM of  
214 the compounds. The effects of detergents were investigated by using sodium dodecyl  
215 sulphate (SDS) and Tween 20 at final concentrations of 0.1 % v/v or 1 % v/v. The  
216 effects of denaturants were examined by using urea and guanidine hydrochloride at  
217 final concentrations of 8 M and 2.5 M, respectively. To test the stability in an organic  
218 medium, enzymes were incubated in the presence of ethanol at final concentrations  
219 of 20 % v/v or 50 % v/v. In each case, the enzyme was incubated with the chemical  
220 agent at 25 °C for 1 h in 50 mM sodium phosphate buffer pH 7.8.

221

## 222 **Crystallization, data collection and structure determination**

223 Crystallization screenings were carried out using the sitting-drop vapor diffusion  
224 method and a Gryphon (Art Robbins Instruments) nanoliter-dispensing crystallization  
225 robot. Following optimization, crystals of  $^{AV3}$ SodB grew after 10-15 days from a 10  
226 mg/ml protein solution, by mixing 1  $\mu$ l of protein solution and 1  $\mu$ l of mother liquor, in a  
227 hanging drop setup with 1 ml mother liquor in the reservoir, at 20 °C. Isomorphous  
228 diffraction-quality  $^{AV3}$ SodB crystals grew in 22 % w/v PEG 8000, 100 mM sodium  
229 cacodylate pH 7.5, 200 mM magnesium acetate, 1 mM flavin mononucleotide (FMN)  
230 or 30 % w/v PEG 4000, 100 mM sodium acetate pH 4.6, 200 mM ammonium acetate,  
231 1 mM FMN or 30 % w/v PEG 4000, 100 mM Tris pH 8.5, 200 mM sodium acetate, 1 mM  
232 FMN as mother liquor. Single crystals were cryoprotected in mother liquor containing  
233 25 % v/v glycerol and flash-frozen in liquid nitrogen. X-ray diffraction data were  
234 collected at the synchrotron beamline I04 (Diamond Synchrotron, UK), at 100 K, using  
235 wavelength 0.9795 Å. Diffraction data were processed using XDS<sup>27</sup> and scaled with  
236 Aimless<sup>28</sup> from the CCP4 program suite<sup>29</sup>.

237 The crystal structure of  $^{AV3}$ SodB was solved by molecular replacement using  
238 the program Phaser<sup>30</sup> and the atomic coordinates of *E. coli* FeSOD from PDB entry  
239 1ISA as search probe. The structure was refined through iterative cycles of manual  
240 model building with *Coot*<sup>31</sup> and reciprocal space refinement with phenix.refine<sup>32</sup>. The  
241 iron atom and the FMN molecule were manually placed in a *mFo-DFc* sigma-A-  
242 weighted electron density map employing *Coot*<sup>31</sup> and the resulting model was refined  
243 as described above. The final structure was validated through the Molprobtity server<sup>33</sup>.  
244 It contained more than 97 % of residues within favoured regions of the Ramachandran  
245 plot, with no outliers. Figures were generated and rendered with Pymol 1.8.x  
246 (Schrödinger, LLC). Atomic coordinates and structure factors have been deposited in  
247 the Protein Data Bank under the accession code 7SBH.

248

## 249 **Subcellular fractionation**

250 The cellular fractionation of *Acinetobacter* sp. Ver3 was carried out by a two-  
251 step osmotic shock process. Briefly, cells were harvested and resuspended in buffer  
252 20 mM Tris-HCl, 20 % w/v sucrose, pH 8.0, supplemented with 0.5 mM PMSF. The  
253 resuspension volume was normalized according to the formula  $V = 0.05 \text{ OD}_{600} V_c$ ,  
254 where  $V_c$  is the starting volume of the culture. The suspension was incubated 1 h at 4  
255 °C. Then, 5 ml of ice-cold water were added per ml of suspension and the mixture was  
256 further incubated for 1 h under the same conditions. After centrifugation at 15,000 rpm  
257 for 30 min at 4 °C, the supernatant (*i.e.* the total periplasmic fraction) was collected  
258 and stored at 4 °C. The pellet, consisting of spheroplasts, was resuspended in an  
259 equivalent volume of disruption buffer and lysed by sonication as described above.

260 Finally the total periplasmic fraction was centrifuged at 45,000 rpm for 3 h at 4°C  
261 allowing to obtain the soluble and insoluble periplasmic fractions. The latter was  
262 resuspended in 20 mM Tris-HCl pH 8.0.

263

## 264 **Purification of outer membrane vesicles (OMVs)**

265 OMVs were purified from long-term stationary phase cultures of *Acinetobacter*  
266 sp. Ver3. Briefly, 1 ml of saturated culture was inoculated on 100 ml LB media and  
267 incubated overnight at 30 °C. Cells were then harvested and the supernatant was  
268 filtered through a 0.22 µm-membrane (Millipore) and centrifuged at 60,000 rpm for 4  
269 h at 4 °C. The pellet containing the OMVs was resuspended in 20 mM Tris-HCl pH 8.0  
270 and stored at -20 °C.

271

## 272 **RNA extraction and quantitative real-time reverse transcription PCR**

273 Total RNA from *Acinetobacter* sp. Ver3 was isolated using TRI-Reagent<sup>R</sup>  
274 (Molecular Research Center, Inc., Cincinnati, OH, USA) according to the  
275 manufacturer's instructions. The quality and quantity of RNA samples were evaluated  
276 by agarose gel electrophoresis and electronic absorption (Abs<sub>260nm/280nm</sub>). Samples  
277 were treated with RQ1 RNase-free DNase (Promega, Madison, WI, USA) to remove  
278 possible DNA contaminants prior to reverse transcription. To obtain cDNA, 2 µg of  
279 RNA was used in the reverse transcription reaction with random primers, employing  
280 M-MLV Reverse Transcriptase (Promega<sup>R</sup>) according to the manufacturer's  
281 instructions. Real-time PCRs were carried out on a StepOne device (Applied  
282 Biosystems, Thermo Fisher Scientific, Foster City, CA, USA) with 59 HOT FIREPol<sup>R</sup>  
283 Eva- Green qPCR Mix Plus (ROX; Solis BioDyne, Tartu, Estonia) using specific  
284 primers (Table S2).

285 Results for <sup>AV3</sup>*sodB* and <sup>AV3</sup>*sodC* mRNAs were normalized to the mRNA of *recA*  
286 and *rpoB*, considered housekeeping genes, based on the standard curve quantitative  
287 method<sup>34</sup>. The specificity of each reaction was verified by melting curves between 55  
288 °C and 95 °C with continuous fluorescence measurements.

289

## 290 **Bioinformatic analyses**

291 The complete genome of *Acinetobacter* sp. Ver3 was previously reported and  
292 deposited in the RAST annotation server (<https://rast.nmpdr.org/>) and the NCBI  
293 database under accession number JFYL01<sup>35</sup>. The deduced protein sequences of  
294 *Acinetobacter* sp. Ver3 <sup>AV3</sup>SodB and <sup>AV3</sup>SodC (EZQ10255.1 and EZQ12222.1,  
295 respectively) were retrieved from the NCBI database. In each case, a multiple



296 sequence alignment with related proteins was performed using MAFFT version 7.475  
297 (<https://mafft.cbrc.jp/alignment/software/>) with default parameters.

298 Structurally characterized FeSODs, MnSODs and cambialistic Fe/MnSODs  
299 (here collectively referred to as Fe-MnSODs) available at the PDB with more than 30  
300 % sequence identity compared to <sup>AV3</sup>SodB and 80 % query coverage were sequence  
301 aligned with <sup>AV3</sup>SodB. In the case of <sup>AV3</sup>SodC, in addition to enzymes available at the  
302 PDB, 16 orthologous sequences retrieved from the NCBI with at least 57 % sequence  
303 identity with <sup>AV3</sup>SodC and 70 % query coverage were also used. Alignments were  
304 visualized and annotated using Jalview<sup>36</sup>.

305 Two unrooted phylogenetic trees were built based on the amino acid sequence  
306 alignments of the *Acinetobacter sp. Ver3* SOD enzymes by using the Maximum  
307 likelihood method (with a WAG+I+G4 substitution model). The bioinformatic software  
308 IQ-TREE multicore version 1.6.11<sup>37</sup> was employed to generate both trees and their  
309 reliability was tested by bootstrapping with 10,000 repetitions. Results were visualized  
310 using the online tool iTOL V5.7 (<https://itol.embl.de/>).

311 A comparative genomic analysis of *Acinetobacter* strains available at the NCBI  
312 database on September 16<sup>th</sup>, 2020 was performed. Only strains with genomic  
313 sequence assemblies classified as complete or scaffolds were included in the study.  
314 The genomic and proteomic data corresponding to 314 strains were extracted, and a  
315 local database was constructed. SODs encoded by *A. baumannii* ATCC 17978 were  
316 used as query to perform BLASTp-sequence similarity searches<sup>38</sup> against the local  
317 database, using 40 % sequence identity and 90 % query coverage cut-off values in  
318 the case of Fe-MnSODs and 55 % sequence identity and 75 % query coverage for  
319 CuZnSODs. The bioinformatic software Signal P v5.0  
320 (<http://www.cbs.dtu.dk/services/SignalP/>) was used to predict the presence or  
321 absence of signal peptide sequences in Fe-MnSODs and CuZnSODs.

322

## 323 RESULTS

### 324 *Acinetobacter sp. Ver3* encodes two putative SOD enzymes

325 The genome of *Acinetobacter sp. Ver3* contains two putative SOD genes<sup>35</sup>.  
326 CL42\_08295 is located on contig JFYL01000023.1, is the second gene within a  
327 putative two-gene operon and exhibits homology to *sodB* genes of gram-negative  
328 bacteria (Fig. 1). On the other hand, CL42\_01680 is located on contig  
329 JFYL01000003.1, has homology to *sodC* genes of gram-negative bacteria and is  
330 predicted to constitute a monocistronic transcription unit.

331 The putative proteins encoded by the *sodB* and *sodC* genes from *Acinetobacter*  
332 *sp. Ver3* (<sup>AV3</sup>SodB and <sup>AV3</sup>SodC, respectively) were used as queries in BLASTp

333 searches. The closest match of  $AV^3SodB$  in the PDB was the FeSOD from  
334 *Pseudomonas putida* (63 % identity, PDB code 3SDP). Fig. 2A displays a multiple  
335 sequence alignment of  $AV^3SodB$  and three structurally characterized related enzymes:  
336 the FeSOD (PDB code 1ISA) and MnSOD (PDB code 1VEW) from *E. coli* (60 % and  
337 44 % amino acid identity, respectively) and the cambialistic SOD (PDB code 1QNN)  
338 from *P. gingivalis* (50 % identity). It shows that  $AV^3SodB$  harbours motifs that are  
339 characteristic of FeSODs, such as the motifs AAQ and DVEWHAYY involved in  
340 catalysis<sup>39</sup>. A phylogenetic tree built for  $AV^3SodB$  and diverse FeSODs, MnSODs as  
341 well as cambialistic Fe/MnSODs (here collectively referred to as Fe-MnSODs) of  
342 known structure consisted of three different clades, with archaeal and bacterial  
343 FeSODs grouped in two different clades whereas bacterial MnSODs constituted a third  
344 one (Fig. 2B). As expected,  $AV^3SodB$  clustered with bacterial FeSODs. On the other  
345 hand, the closest match of  $AV^3SodC$  in the PDB was the CuZnSOD from *Haemphylus*  
346 *ducrey* (53 % identity, PDB code 1Z9N). The sequence alignment in Fig. 2C highlights  
347 the conservation of metal binding residues in  $AV^3SodC$  and representative CuZnSODs  
348 retrieved from the NCBI database.

349 Since FeSODs and CuZnSODs can present different subcellular locations<sup>10</sup>,  
350 we decided to analyse whether  $AV^3SodB$  and/or  $AV^3SodC$  presented signal sequences.  
351 No signal peptide was found for  $AV^3SodB$  using the Signal P 5.0 algorithm<sup>40</sup>,  
352 suggesting that this enzyme is likely cytosolic. In contrast,  $AV^3SodC$  displayed a 26-  
353 amino acid hydrophobic N-terminal sequence that is typical of signal peptides for  
354 protein export<sup>41</sup> (Fig. 2C). A phylogenetic tree calculated from the predicted mature  
355 forms of  $AV^3SodC$  and a variety of CuZnSODs available at the PDB and the NCBI  
356 databases pointed out that  $AV^3SodC$  clusters with CuZnSODs from the  
357 gammaproteobacteria *Serratia sp.*, *Salmonella enterica* and *Klebsiella pneumoniae*  
358 (Fig. 2D). Notably, enzymes belonging to this clade consistently display a putative  
359 lipoprotein signal peptide with a predicted lipobox cysteine residue<sup>41,42</sup> (Fig. 2C).

360

### 361 $AV^3SodB$ and $AV^3SodC^p$ are active enzymes

362 To advance on their characterization, we decided to produce  $AV^3SodB$  and  
363  $AV^3SodC$  by recombinant means.  $AV^3SodB$  was produced in a SOD-deficient *E. coli*  
364 strain and purified from the soluble cell fraction. The activity of  $AV^3SodB$  was assessed  
365 by *in situ* staining after nondenaturing PAGE, as previously described<sup>25</sup>. The obtained  
366 results (Fig. 3A) confirmed that  $AV^3SodB$  is an active enzyme. Besides, the  
367 electrophoretic mobility of the active  $AV^3SodB$  species matches that of the single SOD  
368 activity detected in soluble extracts of *Acinetobacter sp. Ver3* (not shown).

369 We attempted to produce full-length  $AV^3SodC$  similarly to  $AV^3SodB$ , however  
370 these efforts repeatedly failed since multiple proteolytic fragments of the protein were  
371 found in SDS-PAGE analyses (not shown), suggesting a possible processing of the  
372 N-terminal peptide. Therefore, we assayed the production of a  $AV^3SodC$  truncated

373 version lacking the 26-amino acid hydrophobic N-terminal sequence (<sup>AV3</sup>SodC<sup>-p</sup>).  
374 <sup>AV3</sup>SodC<sup>-p</sup> was successfully produced in *E. coli* and purified from the soluble cell  
375 fraction. <sup>AV3</sup>SodC<sup>-p</sup> exhibited two active species in non-denaturing gels, most likely  
376 corresponding to two different oligomeric states of the enzyme<sup>10</sup> (Fig. 3B).

377 The specific activities of both *Acinetobacter sp.* Ver3 SOD enzymes were  
378 determined by the xanthine oxidase method (as described in the Methods section),  
379 resulting in values of 6,600 ± 200 U/mg and 1,800 ± 200 U/mg for <sup>AV3</sup>SodB and  
380 <sup>AV3</sup>SodC<sup>-p</sup>, respectively.

381

### 382 **Biochemical characterization of <sup>AV3</sup>SodB and <sup>AV3</sup>SodC<sup>-p</sup>**

383 To evaluate the potential applications of *Acinetobacter sp.* Ver3 SODs in  
384 industry, we examined the effects of diverse physical and chemical effectors on  
385 enzyme activity. The thermostability of recombinant <sup>AV3</sup>SodB and <sup>AV3</sup>SodC<sup>-p</sup> was  
386 investigated by pre-incubating the enzymes at different temperatures followed by  
387 measurements of the residual activity (Fig. 4A and B). Notably, the activity of <sup>AV3</sup>SodB  
388 was virtually unaffected after a 45 min heat treatment at 50 °C. The enzyme even  
389 retained about 70 % activity after 45 min at 55 °C and 65 % activity after 30 min at 60  
390 °C. On the other hand, <sup>AV3</sup>SodC<sup>-p</sup> conserved only 80 % and 40 % of its activity after  
391 incubation at 45 °C for 15 min or 45 min, respectively. Treatments at higher  
392 temperature resulted in a more pronounced loss of activity. These results indicated  
393 that <sup>AV3</sup>SodB is more thermostable than <sup>AV3</sup>SodC<sup>-p</sup>.

394 The residual activity of <sup>AV3</sup>SodB and <sup>AV3</sup>SodC<sup>-p</sup> was also measured after  
395 incubation in buffers with pH ranging from 3.0 to 12.0. <sup>AV3</sup>SodB displayed a remarkable  
396 stability in the pH range 4.0-10.0, where it retained more than 75 % of its activity (Fig.  
397 4C). <sup>AV3</sup>SodC<sup>-p</sup>, on the other hand, conserved more than 75 % of activity in a narrower  
398 range, between pH values 6.0 and 9.0, pointing out that it is more sensitive to pH  
399 changes than <sup>AV3</sup>SodB.

400 EDTA and β-mercaptoethanol (BME) (1 or 10 mM) were assayed as inhibitors  
401 of <sup>AV3</sup>SodB and <sup>AV3</sup>SodC<sup>-p</sup> (Fig. 4D). <sup>AV3</sup>SodB conserved more than 90 % of its activity  
402 in the presence of both compounds. However, while <sup>AV3</sup>SodC<sup>-p</sup> displayed high  
403 tolerance to BME, EDTA had an inhibitory effect, leading to a 40 % reduction of  
404 enzyme activity when used at 10 mM. SDS and Tween 20 (0.1% v/v or 1 % v/v) were  
405 used to investigate the influence of detergents on enzyme activity (Fig. 4D). SDS  
406 severely impaired <sup>AV3</sup>SodB activity when used at 1 % v/v. All other effects were  
407 negligible. The denaturants urea and guanidine hydrochloride were also assessed, at  
408 final concentrations of 8 M and 2.5 M, respectively. <sup>AV3</sup>SodC<sup>-p</sup> lost approximately half  
409 of its activity when treated with guanidine hydrochloride. In all other cases enzyme  
410 activities remained higher than 70 %. To test the stability of *Acinetobacter sp.* Ver3  
411 SODs in an organic solvent, the enzymes were incubated in reaction buffer

412 supplemented with 20 % v/v or 50 % v/v ethanol.  $^{AV3}$ SodC<sup>p</sup> retained almost 80 % of  
413 its activity in both conditions while  $^{AV3}$ SodB lost nearly all its activity in 50 % v/v ethanol.

414 Overall, these results indicate a higher thermal stability and a broader pH range  
415 for  $^{AV3}$ SodB. Conversely, treatment with inhibitors showed mixed effects on enzyme  
416 activity, with  $^{AV3}$ SodB being altered mainly by SDS and ethanol, whereas  $^{AV3}$ SodC<sup>p</sup>  
417 was affected by EDTA and guanidine hydrochloride.

418

## 419 **Structural characterization of $^{AV3}$ SodB**

420 In order to explore the structural properties of  $^{AV3}$ SodB, we solved the crystal  
421 structure of the enzyme to 1.34 Å resolution (Table 1).  $^{AV3}$ SodB crystallized in space  
422 group C222<sub>1</sub>, with one protein molecule per asymmetric unit. The final atomic model  
423 comprises  $^{AV3}$ SodB residues 1-208. Two neighbouring  $^{AV3}$ SodB monomers related by  
424 crystallographic operations form a protein dimer with cyclic symmetry C<sub>2</sub>, resembling  
425 the quaternary structure of *E. coli* FeSOD (PDB code 1ISA) (Fig. 5A). The RMSD  
426 between the  $^{AV3}$ SodB monomer and the chain A in the *E. coli* FeSOD structure is 0.9  
427 Å for 191 aligned residues. The  $^{AV3}$ SodB monomer adopts the two-domain fold  
428 conserved among FeSODs and MnSODs<sup>10</sup>, with a helical N-terminal domain and a C-  
429 terminal domain composed of three β-sheets surrounded by α-helices (Fig. 2A and  
430 Fig. 5A). Consistent with a dimeric functional state, the loop L2 (residues 43-68) that  
431 connects the two main helices in the N-terminal domain of  $^{AV3}$ SodB, the most variable  
432 in the primary sequence across species, unlike tetrameric enzymes<sup>43,44</sup> is not  
433 extended and establishes hydrophobic interactions with the N-terminal loop L1  
434 (residues 1-19) and the C-terminal domain (Fig. 2A and Fig. 5A). The interfacial area  
435 between  $^{AV3}$ SodB monomers is ca. 920 Å<sup>2</sup> and the residues involved in hydrogen  
436 bonds or salt bridges between subunits are Glu23, His32, Phe125, Ser127, Asn148,  
437 Glu167, His168, Tyr171 and Arg175, all conserved in *E. coli* FeSOD (Fig. 2A and Fig.  
438 5A).

439 The active site of  $^{AV3}$ SodB, located close to the dimer interface, is composed of  
440 conserved residues among FeSODs (Fig. 2A and Fig 5B). *mFo-DFc* electron density  
441 maps clearly revealed the presence of a metal ion bound at the active site, which,  
442 based on our bioinformatic analysis, was modelled as an iron ion. The metal ion is  
443 coordinated in a distorted trigonal bipyramidal geometry with the side chain of His28  
444 and a solvent molecule as axial ligands and the side chains of His80, Asp164 and  
445 His168 as equatorial ligands (Fig. 5B). Residues His28 and His80 are located in  
446 helices α1 and α2, respectively, of the N-terminal domain of  $^{AV3}$ SodB, whereas Asp164  
447 and His168 are located in the strand β3 of the C-terminal domain and the loop that  
448 follows it (Fig. 2A and Fig. 5B).  $^{AV3}$ SodB shares with *E. coli* FeSOD six out of seven  
449 residues at or near the active site that have been identified as specificity signature  
450 positions for metal ion use<sup>10</sup>.

451 The OH<sup>-</sup>/H<sub>2</sub>O ligand hydrogen bonds Asp164 and the active site Gln76 (Fig.  
452 5C). This OH<sup>-</sup>/H<sub>2</sub>O, believed to be OH<sup>-</sup> in oxidized FeSODs and H<sub>2</sub>O in the reduced  
453 enzymes<sup>10</sup>, is connected to bulk water *via* a conserved hydrogen bonding network that  
454 begins with Gln76 and continues with residues Tyr36 and His32. The side chain of  
455 Gln76 is stabilized by hydrogen bonding interactions with residues Tyr36, Asn79 and  
456 Trp129. Additional conserved hydrogen bonds link the active site to the interface  
457 between <sup>AV3</sup>SodB monomers, including a hydrogen bond between His32 of one  
458 monomer and Tyr171 of the other, and a hydrogen bond between His168 of one  
459 monomer and Glu167 of the other.

460 Interestingly, <sup>AV3</sup>SodB crystallized in the presence of flavin mononucleotide  
461 (FMN), added as an additive in homemade crystallization conditions. The isoalloxazine  
462 ring, clearly evident in *mFo-DFc* maps, is buried in a deep pocket formed by helix α2  
463 in the N-terminal domain, loops L1 and L2 and the most C-terminal segment of the  
464 protein (Fig. S1). Notably, similar to the FeSOD from *H. pylori*<sup>45</sup>, the C-terminus of  
465 <sup>AV3</sup>SodB is longer than for other related enzymes (Fig. 2A). The isoalloxazine ring of  
466 the FMN molecule is located at 12.4 Å of the metal ion and it is possible to estimate  
467 an electron transfer path<sup>46</sup> between them through the His33 and His80 residues (Fig.  
468 S1). Electronic absorption measurements after incubating <sup>AV3</sup>SodB with FMN and  
469 removing the excess cofactor by size exclusion chromatography did not, however, give  
470 clear evidence of a binding event in solution (not shown). Furthermore, it is not evident  
471 what biological role the binding of FMN to this enzyme could have. To our knowledge,  
472 the binding of FMN to a superoxide dismutase has not been previously reported.  
473 Although the binding of FMN to <sup>AV3</sup>SodB in the crystal is very intriguing, this could  
474 simply be an artifact and any further exploration of this observation will require specific  
475 experiments.

476

477 **<sup>AV3</sup>SodB is a cytosolic enzyme whereas <sup>AV3</sup>SodC is directed to the bacterial**  
478 **periplasm and loaded into OMVs.**

479 To determine the subcellular localization of <sup>AV3</sup>SodB and <sup>AV3</sup>SodC, we obtained  
480 polyclonal antibodies against the recombinant proteins and used them to perform  
481 Western Blot analyses of *Acinetobacter sp. Ver3* cell fractions. Four different fractions  
482 were prepared: cytosol, soluble periplasmic fraction, insoluble periplasmic fraction and  
483 outer membrane vesicles (OMVs). <sup>AV3</sup>SodB was detected in the bacterial cytosol  
484 whereas <sup>AV3</sup>SodC was additionally found in the insoluble periplasmic fraction (Fig. 6A).  
485 Consistent with the subcellular localization of <sup>AV3</sup>SodC, its N-terminal sequence  
486 comprises a <sup>(-3)</sup>[LVI]<sup>(-2)</sup>[Xaa]<sup>(-1)</sup>[Yaa]<sup>(+1)</sup>C motif (Fig. 2C) that is a hallmark of bacterial  
487 lipoprotein attachment sites<sup>41,42</sup>, suggesting that <sup>AV3</sup>SodC could be associated with the  
488 membrane.

489 Since the CuZnSOD from *A. baumannii* ATCC 17978 has been detected in  
490 OMVs<sup>47</sup>, we investigated whether this was also the case for <sup>AV3</sup>SodC. Indeed, <sup>AV3</sup>SodC

491 was found in OMVs obtained from *Acinetobacter sp. Ver3* cultures (Fig. 6A). Notably,  
492 <sup>AV3</sup>SodC is active when located in OMVs (Fig. 6B).

493

#### 494 **Differential expression of *sodB* and *sodC* in response to pro-oxidant challenges**

495 In order to further explore the physiological roles of <sup>AV3</sup>SodB and <sup>AV3</sup>SodC, we  
496 studied the changes in *sodB* and *sodC* expression in *Acinetobacter sp. Ver3* cells  
497 subjected to pro-oxidant challenges. qRT-PCR analyses were performed from total  
498 RNA samples obtained 10 and 30 min after the exposure of cells to MV, H<sub>2</sub>O<sub>2</sub>, UV  
499 radiation and blue light. The latter treatment was carried out because blue light acts  
500 as a pro-oxidant agent in bacteria by generating ROSs<sup>48</sup>. On the other hand, blue light  
501 induces catalase activity in *Acinetobacter baumannii*<sup>49</sup>, and thus could play an  
502 important role in the defence against oxidative stress.

503 The expression of *sodC* increased about 2-fold after a 30 min blue light  
504 challenge, but no significant changes were observed under the rest of the pro-oxidant  
505 conditions (Fig. 7A). In contrast, *sodB* transcript levels remained unaltered under the  
506 conditions tested. To determine whether these results showed a correlation at the  
507 protein level, exponentially growing cell cultures were exposed to blue light and protein  
508 extracts were then obtained. Soluble fractions as well as OMVs were analysed by  
509 SDS-PAGE followed by anti-<sup>AV3</sup>SodC immunostaining (Fig. 7B). A net accumulation of  
510 <sup>AV3</sup>SodC was observed in OMVs after the blue light treatment.

511

#### 512 **Prevalence of SOD-encoding genes in the *Acinetobacter* genus**

513 In order to explore the diversity of SOD-encoding genes in the *Acinetobacter*  
514 genus, we assembled a local database with 314 publicly available complete genomes,  
515 comprising 53 *Acinetobacter* defined species as well as 21 strains corresponding to  
516 unassigned species (Table 2). BLASTp searches were then performed using the  
517 sequences of the enzymes FeSOD (ABO12765.2)<sup>19</sup> and CuZnSOD (ABO13540.2)  
518 from *A. baumannii* ATCC 17978 as queries. Following the strategy described in the  
519 Methods section, we found 677 proteins (Table S3), and by inspecting the SOD-  
520 encoding genes in the selected *Acinetobacter* strains, we distinguished three  
521 genotypes (Table 2):

522 (i) Genotype 1 (1 FeSOD + 1 CuZnSOD; 83.4 % of the strains). This group  
523 contains representatives of 28 species, but it is remarkably enriched in those that have  
524 been associated with nosocomial infections, such as *A. baumannii*, *A. pittii* and *A.*  
525 *nosocomialis*. It also includes 17 unassigned strains, such as *Acinetobacter sp. Ver3*.  
526 CuZnSOD enzymes in this group contain a predicted lipoprotein signal peptide and  
527 could thus be translocated to the periplasm or the extracellular space similarly to

528 <sup>AV3</sup>SodC. We also include in this group three *A. baumannii* strains (921, 3207, 7835),  
529 bearing two FeSOD encoding genes, which were denominated *sodB1* and *sodB2*.

530 (ii) Genotype 2 (1 FeSOD + 1 MnSOD + 1 CuZnSOD; 10.2 % of the strains).  
531 This class encompasses a total of 18 *Acinetobacter* species and 3 unassigned strains.  
532 MnSODs in 27 out of 32 strains of this group are predicted to be cytosolic enzymes,  
533 with the exception of one *A. beijerinckii* and three *A. junii* strains, which encode  
534 MnSOD variants with a predicted signal peptide without a lipidation motif (Fig. S2).  
535 Interestingly, *A. bereziniae* XH901 encodes MnSODs of the two types, comprising a  
536 total of 4 SOD encoding-genes in the genome. Similar to genotype 1, CuZnSOD  
537 enzymes in this group contain a predicted lipoprotein signal peptide.

538 (iii) Genotype 3 (1 FeSOD + 1 or 2 MnSOD; 6.1 % of the strains). This group  
539 contains 7 species comprising a total of 18 strains, with *A. haemolyticus* the most  
540 prevalent species (11 strains). One strain corresponding to an *Acinetobacter*  
541 unassigned species is also included in this group. Remarkably, all strains encode a  
542 MnSOD enzyme containing a putative signal peptide without a lipidation motif (Fig.  
543 S2), which could be directed to the periplasmic space to play a CuZnSOD-like role.  
544 Twelve strains additionally bear a putative cytosolic MnSOD.

545 An uncategorized case is that of the species *A. apis*, which encodes 1  
546 CuZnSOD and 1 MnSOD (Table 2), but lacks a FeSOD-encoding gene. The MnSOD  
547 is predicted to be cytosolic (Fig. S2).

548

## 549 **DISCUSSION**

550 SOD enzymes are ubiquitous in biology, so understanding the principles that  
551 govern their kinetic parameters, the use of metal cofactors and the subcellular  
552 localization has diverse implications. From a biotechnological point of view, the  
553 characterization of SODs isolated from extremophiles is attractive since these  
554 enzymes usually work under advantageous conditions in industrial processes. From a  
555 medical perspective, SODs are part of the bacterial defence against oxidative stress  
556 and by detoxifying the superoxide produced by the mammalian immune system in  
557 response to infection they play a crucial role in pathogenesis. In this work we carried  
558 out a biochemical and structural characterization of <sup>AV3</sup>SodB and <sup>AV3</sup>SodC, the SOD  
559 enzymes encoded by the extremophile *Acinetobacter* sp. Ver3. Such analyses were  
560 accompanied by an investigation of gene expression and the subcellular localization  
561 of the proteins. Finally, we assessed the prevalence of different SOD types in the  
562 genus *Acinetobacter*, in which not only free-living species are found, but also important  
563 pathogens.

564 The specific activity of <sup>AV3</sup>SodB (6,600 ± 200 U/mg) resulted similar to that of  
565 *E. coli* FeSOD (6,700 U/mg)<sup>50</sup>, although <sup>AV3</sup>SodB (Fig. 4A and C) showed a higher

566 thermal stability and activity in a broader pH range, comparable to the reported  
567 properties of the iron form of the cambialistic Fe/MnSOD from *Propionibacterium*  
568 *shermanii*<sup>51</sup>. On the other hand, <sup>AV3</sup>SodC<sup>-p</sup> (<sup>AV3</sup>SodC devoid of its N-terminal  
569 sequence) presented a lower specific activity (1,800 ± 200 U/mg) than *E. coli*  
570 CuZnSOD (3,700 U/mg)<sup>52</sup> and <sup>AV3</sup>SodB. Besides, <sup>AV3</sup>SodC<sup>-p</sup> activity was more  
571 susceptible to heat inactivation and extreme pHs than <sup>AV3</sup>SodB (Fig. 4A, B and C). The  
572 activity of <sup>AV3</sup>SodB and <sup>AV3</sup>SodC<sup>-p</sup> was also tested in the presence of different potential  
573 inhibitors (Fig. 4D). BME in a concentration of up to 10 mM did not alter the activity of  
574 either of the two enzymes. In the case of <sup>AV3</sup>SodB, this is consistent with the absence  
575 of Cys residues in the protein sequence; on the other hand, although <sup>AV3</sup>SodC<sup>-p</sup> has  
576 three Cys residues, these results do not support a modulation of the enzyme activity  
577 in response to changes in their oxidation state. Of all the other chemical agents tested,  
578 including a chelating agent, two detergents, two denaturing agents and an organic  
579 solvent, only the addition of 50% ethanol to <sup>AV3</sup>SodB resulted in an almost complete  
580 loss of activity; on the other hand, for all other treatments the two enzymes retained at  
581 least 50% of the basal activity, maintaining more than 80-90% of it in most cases.  
582 These properties make *Acinetobacter sp. Ver3* SOD enzymes attractive for use in  
583 industrial applications. Besides, we report the crystal structure of <sup>AV3</sup>SodB to 1.34 Å  
584 resolution, one of the highest resolutions achieved for an enzyme of this type. <sup>AV3</sup>SodB  
585 bears ca. 90 % amino acid identity with the equivalent enzyme in *A. baumannii*, an  
586 important target for drug design<sup>19</sup>. Thus, we present detailed biochemical and  
587 structural data relevant in oxidative stress processes in environmental as well as  
588 pathogenic species.

589 We provide evidence that <sup>AV3</sup>SodB is a cytosolic enzyme whereas <sup>AV3</sup>SodC is  
590 also found in the periplasmic space (Fig. 6A). What is more, we show that <sup>AV3</sup>SodC is  
591 loaded in an active state in OMVs (Fig. 6A and B), consistent with previous reports for  
592 *A. baumannii*<sup>47</sup>. The presence of <sup>AV3</sup>SodC in OMVs suggests that this enzyme, in  
593 addition to playing a protective role in the periplasmic space, could also act by  
594 regulating the redox state in the extracellular microenvironment. Interestingly, while  
595 *sodB* transcriptional levels remained unaltered, a blue light treatment induced a  
596 twofold increase in the expression of *sodC* (Fig. 7A), which was accompanied by a  
597 higher amount of the protein detected in OMVs (Fig. 7B). Previous studies concluded  
598 that blue light triggers the production of ROSs and leads to cell damage<sup>53</sup>, being able  
599 to modulate the metabolism, virulence, motility and even the tolerance to antibiotics of  
600 *Acinetobacter* species<sup>49,54,55</sup>. Altogether, these results indicate that SodC activity is  
601 critical for these bacteria to mount an effective defence against oxidative damage.

602 According to our bioinformatic analysis, 52 out of 53 *Acinetobacter* species  
603 analysed contain at least one *sodB* gene encoding a cytoplasmic FeSOD (Fig. 8A, B  
604 and C). The only exception was *A. apis* HYN18(T), a strain isolated from the intestinal  
605 tract of a honeybee, which shows a relatively small 2.41 Mbp genome<sup>56</sup>. We  
606 hypothesize that the adaptation of this strain to the host intestinal tract has led to a  
607 genomic reduction, with the consequent loss of the *sodB* gene. Still, *A. apis* conserves



608 a *sodA* gene coding for a cytoplasmic MnSOD, highlighting the role of cytoplasmic  
609 SODs in response to oxidative stress. On the other hand, 46 out of 52 *Acinetobacter*  
610 species encode a periplasmic CuZnSOD (Genotypes 1 and 2, Fig. 8A and B), while  
611 seven species (Genotype 3, Fig. 8C) encode instead a MnSOD with a putative signal  
612 peptide (Fig. S2). Such MnSODs, lacking a lipidation motif, could perform functions  
613 similar to those of CuZnSODs in the bacterial periplasm, although they would not be  
614 directed to (and thus would not act on) OMVs. The presence of a periplasmic SOD in  
615 all *Acinetobacter* strains under study suggests that such a variant is necessary for  
616 crucial protective roles in the periplasmic space. This hypothesis is supported by  
617 several works that have demonstrated the participation of periplasmic SODs in the  
618 resistance to the respiratory burst elicited by the human immune system in response  
619 to pathogens<sup>57</sup>.

620 Most pathogenic *Acinetobacter* species, included within the ABC complex,  
621 code for only two SODs: a cytosolic FeSOD and a periplasmic CuZnSOD (Genotype  
622 1, Fig. 8A). On the other hand, environmental strains, which are closer to the root of  
623 the *Acinetobacter* phylogenetic tree<sup>58</sup>, have more diverse genotypes regarding  
624 encoded SODs (Genotypes 1 to 3, Fig. 8A, B and C). According to previous findings  
625 for SODs in the genus *Staphylococcus*, it has been proposed that ancestral species  
626 often harbour MnSODs while the more recent ones, usually linked to infectious  
627 processes, have evolved cambialistic Fe/MnSODs due to the low bioavailability of  
628 manganese ions in the host<sup>39</sup>. The differences observed among genotypes in  
629 *Acinetobacter* can in fact be explained similarly. Thus, nosocomial *Acinetobacter*  
630 species might have lost cytoplasmic MnSODs in favour of FeSODs encoding genes;  
631 even though the bioavailability of iron ions is also scarce, *Acinetobacter* species  
632 harbour an arsenal of mechanisms for their scavenging<sup>59,60</sup>. On the other hand,  
633 periplasmic MnSODs in *Acinetobacter* might have been replaced by CuZnSODs  
634 during the evolution of pathogenic species.

635 The identification of *sodB2*, a gene possibly acquired by horizontal gene  
636 transfer (Fig. S3) and which encodes an additional FeSOD in three clinical strains of  
637 *A. baumannii* (Table 2), supports the notion that this SOD type is prevalent in modern  
638 strains. The *sodB2* genes are located next to a *GIsul2* genomic island<sup>61,62</sup>, which  
639 contains a *sul2* gene that confers resistance to sulphonamides as well as genes that  
640 confer resistance to tetracycline and chloramphenicol. Given that exposure to  
641 antibiotics generates ROSs and thus produces oxidative stress in *Acinetobacter*<sup>63</sup>, it  
642 is tempting to speculate that SOD activity acts in conjunction with antibiotic resistance  
643 mechanisms to counteract the deleterious effects of antimicrobial agents. In favour of  
644 this hypothesis, a *sodB1* mutation in *A. baumannii* ATCC17978 leads to increased  
645 susceptibility to antibiotics<sup>19</sup>.

646 Our bioinformatic analysis support the critical role played by SOD enzymes in  
647 the *Acinetobacter* genus, which thereby can be proposed as new therapeutic targets  
648 in pathogenic species such as *A. baumannii*. The high-resolution structural data

649 presented here provides instrumental information for the design of SodB-specific  
650 inhibitors to control nosocomial infections caused by opportunistic bacteria.  
651 Additionally, the biochemical information reported for the SOD enzymes studied may  
652 be relevant for future applications in food, agriculture or industrial processes. In  
653 summary, this multidisciplinary approach serves to frame future studies on the role of  
654 SOD enzymes in the defence of pathogenic or environmental Acinetobacter species  
655 against oxidative stress.

656

#### 657 **DATA AVAILABILITY**

658 Structure factors and atomic coordinates were deposited in the Protein Data  
659 Bank under the accession code 7SBH.

660

#### 661 **ACKNOWLEDGEMENTS**

662 This paper is dedicated to the memory of Dr. Cortez, a distinguished colleague  
663 and beloved friend.

664

#### 665 **FUNDING**

666 This work was supported by grants from the Agencia Nacional de Promoción  
667 de la Investigación, el Desarrollo Tecnológico y la Innovación (Agencia I+D+i,  
668 Argentina) received by N.C. (PICT 2015-1492); B.A.S. is a doctoral fellow of the  
669 Consejo Nacional de Investigaciones Científicas y Técnicas, Argentina (CONICET);  
670 M.G.S. is a former doctoral fellow of CONICET; D.A. and M.N.L. are researchers of  
671 CONICET; G.D.R. is a former researcher of CONICET.

672

#### 673 **AUTHOR CONTRIBUTIONS STATEMENT**

674 B.A.S. designed and performed experiments and participated in the  
675 interpretation of results. M.G.S. performed RT-qPCR assays. D.A. designed and  
676 performed crystallization trials. M.N.L. designed the crystallographic experiment,  
677 collected X-ray diffraction data, solved the crystal structure of <sup>AV3</sup>SodB, interpreted  
678 results and wrote the paper. G.D.R. performed bioinformatics analyses and wrote the  
679 paper. N.C., M.N.L. and G.D.R. developed concepts and designed the work. All  
680 authors read and approved the final manuscript.

681

## 682 CONFLICT OF INTERESTS STATEMENT

683 The authors declare no conflict of interest.

684

## 685 LITERATURE CITED

- 686 1. Albarracín, V. H., Gärtner, W. & Farias, M. E. Forged Under the Sun: Life and  
687 Art of Extremophiles from Andean Lakes. *Photochem. Photobiol.* **92**, 14–28  
688 (2016).
- 689 2. Ordoñez, O. F., Flores, M. R., Dib, J. R., Paz, A. & Farías, M. E. Extremophile  
690 Culture Collection from Andean Lakes: Extreme Pristine Environments that Host  
691 a Wide Diversity of Microorganisms with Tolerance to UV Radiation. *Microb.*  
692 *Ecol.* **58**, 461–473 (2009).
- 693 3. R. Flores, M., F. Ordoñez, O., J. Maldonado, M. & E. Farías, M. Isolation of UV-  
694 B resistant bacteria from two high altitude Andean lakes (4,400 m) with saline  
695 and non saline conditions. *J. Gen. Appl. Microbiol.* **55**, 447–458 (2009).
- 696 4. Albarracín, V. H. *et al.* Extremophilic Acinetobacter Strains from High-Altitude  
697 Lakes in Argentinean Puna: Remarkable UV-B Resistance and Efficient DNA  
698 Damage Repair. *Orig. Life Evol. Biosph.* **42**, 201–221 (2012).
- 699 5. Di Capua, C., Bortolotti, A., Farías, M. E. & Cortez, N. UV-resistant  
700 *Acinetobacter sp.* isolates from Andean wetlands display high catalase activity.  
701 *FEMS Microbiol. Lett.* **317**, 181–189 (2011).
- 702 6. Albarracín, V. H. *et al.* First characterisation of a CPD-class I photolyase from a  
703 UV-resistant extremophile isolated from High-Altitude Andean Lakes.  
704 *Photochem. Photobiol. Sci.* **13**, 739–750 (2014).
- 705 7. Sartorio, M. G., Cortez, N. & González, J. M. Structure and functional  
706 properties of the cold-Adapted catalase from *Acinetobacter sp.* Ver3 native to  
707 the Atacama plateau in northern Argentina. *Acta Crystallogr. Sect. D Struct. Biol.*  
708 **77**, 369–379 (2021).
- 709 8. Sartorio, M. G., Repizo, G. D. & Cortez, N. Catalases of the polyextremophylic  
710 Andean isolate *Acinetobacter sp.* Ver 3 confer adaptive response to H<sub>2</sub>O<sub>2</sub> and  
711 UV radiation. *FEBS J.* **287**, 4525–4539 (2020).
- 712 9. Abreu, I. A. & Cabelli, D. E. Superoxide dismutases—a review of the metal-  
713 associated mechanistic variations. *Biochim. Biophys. Acta - Proteins*  
714 *Proteomics* **1804**, 263–274 (2010).
- 715 10. Sheng, Y. *et al.* Superoxide Dismutases and Superoxide Reductases. *Chem.*  
716 *Rev.* **114**, 3854–3918 (2014).

- 717 11. Carlioz, A. & Touati, D. Isolation of superoxide dismutase mutants in *Escherichia*  
718 *coli*: is superoxide dismutase necessary for aerobic life? *EMBO J.* **5**, 623–630  
719 (1986).
- 720 12. Benov, L. T. & Fridovich, I. *Escherichia coli* expresses a copper- and zinc-  
721 containing superoxide dismutase. *J. Biol. Chem.* **269**, 25310–4 (1994).
- 722 13. Steinman, H. M. Function of periplasmic copper-zinc superoxide dismutase in  
723 *Caulobacter crescentus*. *J. Bacteriol.* **175**, 1198–1202 (1993).
- 724 14. Farrant, J. L. *et al.* Bacterial copper- and zinc-cofactored superoxide dismutase  
725 contributes to the pathogenesis of systemic salmonellosis. *Mol. Microbiol.* **25**,  
726 785–796 (1997).
- 727 15. Fang, F. C. *et al.* Virulent *Salmonella typhimurium* has two periplasmic Cu, Zn-  
728 superoxide dismutases. *Proc. Natl. Acad. Sci.* **96**, 7502–7507 (1999).
- 729 16. Figueroa-Bossi, N. & Bossi, L. Inducible prophages contribute to *Salmonella*  
730 virulence in mice. *Mol. Microbiol.* **33**, 167–176 (1999).
- 731 17. Sly, L. M., Guiney, D. G. & Reiner, N. E. *Salmonella enterica* serovar  
732 *Typhimurium* periplasmic superoxide dismutases SodCI and SodCII are  
733 required for protection against the phagocyte oxidative burst. *Infect. Immun.* **70**,  
734 5312–5315 (2002).
- 735 18. Krishnakumar, R., Craig, M., Imlay, J. A. & Slauch, J. M. Differences in  
736 enzymatic properties allow SodCI but not SodCII to contribute to virulence in  
737 *Salmonella enterica* serovar *typhimurium* strain 14028. *J. Bacteriol.* **186**, 5230–  
738 5238 (2004).
- 739 19. Heindorf, M., Kadari, M., Heider, C., Skiebe, E. & Wilharm, G. Impact of  
740 *Acinetobacter baumannii* Superoxide Dismutase on Motility, Virulence,  
741 Oxidative Stress Resistance and Susceptibility to Antibiotics. *PLoS One* **9**,  
742 e101033 (2014).
- 743 20. Hassan, K. A. *et al.* Zinc stress induces copper depletion in *Acinetobacter*  
744 *baumannii*. *BMC Microbiol.* **17**, 59 (2017).
- 745 21. Sambrook, J. & Russell, D. Molecular Cloning: A Laboratory Manual 3rd edn  
746 Plainview. *New York Cold Spring Harb. Lab.* (2001).
- 747 22. Tabares, L. C., Bittel, C., Carrillo, N., Bortolotti, A. & Cortez, N. The Single  
748 Superoxide Dismutase of *Rhodobacter capsulatus* Is a Cambialistic,  
749 Manganese-Containing Enzyme. *J. Bacteriol.* **185**, 3223–3227 (2003).
- 750 23. LAEMMLI, U. K. Cleavage of Structural Proteins during the Assembly of the  
751 Head of Bacteriophage T4. *Nature* **227**, 680–685 (1970).
- 752 24. Bradford, M. A Rapid and Sensitive Method for the Quantitation of Microgram  
753 Quantities of Protein Utilizing the Principle of Protein-Dye Binding. *Anal.*  
754 *Biochem.* **72**, 248–254 (1976).

- 755 25. Beauchamp, C. & Fridovich, I. Superoxide dismutase: Improved assays and an  
756 assay applicable to acrylamide gels. *Anal. Biochem.* **44**, 276–287 (1971).
- 757 26. McCord, J. M., Fridovich, I., Mccords, J. M. & Fridovich, I. Superoxide  
758 dismutase. An enzymic function for erythrocuprein (hemocuprein). *J. Biol.*  
759 *Chem.* **244**, 6049–6055 (1969).
- 760 27. Kabsch, W. XDS. *Acta Crystallogr. Sect. D Biol. Crystallogr.* **66**, 125–132  
761 (2010).
- 762 28. Evans, P. R. & Murshudov, G. N. How good are my data and what is the  
763 resolution? *Acta Crystallogr. Sect. D Biol. Crystallogr.* **69**, 1204–1214 (2013).
- 764 29. Winn, M. D. *et al.* Overview of the CCP 4 suite and current developments. *Acta*  
765 *Crystallogr. Sect. D Biol. Crystallogr.* **67**, 235–242 (2011).
- 766 30. McCoy, A. J. *et al.* Phaser crystallographic software. *J. Appl. Crystallogr.* **40**,  
767 658–674 (2007).
- 768 31. Emsley, P., Lohkamp, B., Scott, W. G. & Cowtan, K. Features and development  
769 of Coot. *Acta Crystallogr. Sect. D Biol. Crystallogr.* **66**, 486–501 (2010).
- 770 32. Afonine, P. V. *et al.* Towards automated crystallographic structure refinement  
771 with phenix.refine. *Acta Crystallogr. Sect. D Biol. Crystallogr.* **68**, 352–367  
772 (2012).
- 773 33. Williams, C. J. *et al.* MolProbity: More and better reference data for improved  
774 all-atom structure validation. *Protein Sci.* **27**, 293–315 (2018).
- 775 34. Pfaffl, M. W. A new mathematical model for relative quantification in real-time  
776 RT-PCR. *Nucleic Acids Res.* **29**, e45 (2001).
- 777 35. Kurth, D. *et al.* Genomic and proteomic evidences unravel the UV-resistome of  
778 the poly-extremophile *Acinetobacter sp.* Ver3. *Front. Microbiol.* **6**, 1–18 (2015).
- 779 36. Waterhouse, A. M., Procter, J. B., Martin, D. M. A., Clamp, M. & Barton, G. J.  
780 Jalview Version 2-A multiple sequence alignment editor and analysis  
781 workbench. *Bioinformatics* **25**, 1189–1191 (2009).
- 782 37. Trifinopoulos, J., Nguyen, L.-T., von Haeseler, A. & Minh, B. Q. W-IQ-TREE: a  
783 fast online phylogenetic tool for maximum likelihood analysis. *Nucleic Acids Res.*  
784 **44**, W232–W235 (2016).
- 785 38. Altschul, S. F., Gish, W., Miller, W., Myers, E. W. & Lipman, D. J. Basic local  
786 alignment search tool. *J. Mol. Biol.* **215**, 403–410 (1990).
- 787 39. Barwinska-Sendra, A. *et al.* An evolutionary path to altered cofactor specificity  
788 in a metalloenzyme. *Nat. Commun.* **11**, 2738 (2020).
- 789 40. Almagro Armenteros, J. J. *et al.* SignalP 5.0 improves signal peptide predictions  
790 using deep neural networks. *Nat. Biotechnol.* **37**, 420–423 (2019).

- 791 41. Babu, M. M. *et al.* A database of bacterial lipoproteins (DOLOP) with functional  
792 assignments to predicted lipoproteins. *J. Bacteriol.* **188**, 2761–2773 (2006).
- 793 42. Kovacs-Simon, A., Titball, R. W. & Michell, S. L. Lipoproteins of Bacterial  
794 Pathogens. *Infect. Immun.* **79**, 548–561 (2011).
- 795 43. Cooper, J. B. *et al.* X-ray Structure Analysis of the Iron-dependent Superoxide  
796 Dismutase from *Mycobacterium tuberculosis* at 2.0 Ångstroms Resolution  
797 Reveals Novel Dimer–Dimer Interactions. *J. Mol. Biol.* **246**, 531–544 (1995).
- 798 44. Lim, J.-H. *et al.* The crystal structure of an Fe-superoxide dismutase from the  
799 hyperthermophile *Aquifex pyrophilus* at 1.9 Å resolution: structural basis for  
800 thermostability. *J. Mol. Biol.* **270**, 259–274 (1997).
- 801 45. Esposito, L. *et al.* The crystal structure of the superoxide dismutase from  
802 *Helicobacter pylori* reveals a structured C-terminal extension. *Biochim. Biophys.*  
803 *Acta - Proteins Proteomics* **1784**, 1601–1606 (2008).
- 804 46. Tazhigulov, R. N., Gayvert, J. R., Wei, M. & Bravaya, K. B. eMap: A Web  
805 Application for Identifying and Visualizing Electron or Hole Hopping Pathways in  
806 Proteins. *J. Phys. Chem. B* **123**, 6946–6951 (2019).
- 807 47. Kwon, S.-O., Gho, Y. S., Lee, J. C. & Kim, S. II. Proteome analysis of outer  
808 membrane vesicles from a clinical *Acinetobacter baumannii* isolate. *FEMS*  
809 *Microbiol. Lett.* **297**, 150–156 (2009).
- 810 48. Tardu, M., Bulut, S. & Kavakli, I. H. MerR and ChrR mediate blue light induced  
811 photo-oxidative stress response at the transcriptional level in *Vibrio cholerae*.  
812 *Sci. Rep.* **7**, 40817 (2017).
- 813 49. Müller, G. L. *et al.* Light Modulates Metabolic Pathways and Other Novel  
814 Physiological Traits in the Human Pathogen *Acinetobacter baumannii*. *J.*  
815 *Bacteriol.* **199**, (2017).
- 816 50. Vance, C. K. & Miller, A.-F. Novel Insights into the Basis for *Escherichia coli*  
817 Superoxide Dismutase’s Metal Ion Specificity from Mn-Substituted FeSOD and  
818 Its Very High E m †. *Biochemistry* **40**, 13079–13087 (2001).
- 819 51. Meier, B., Parak, F., Desideri, A. & Rotilio, G. Comparative stability studies on  
820 the iron and manganese forms of the cambialistic superoxide dismutase from  
821 *Propionibacterium shermanii*. *FEBS Lett.* **414**, 122–124 (1997).
- 822 52. Benov, L. T., Beyer, W. F., Stevens, R. D. & Fridovich, I. Purification and  
823 characterization of the Cu,Zn SOD from *Escherichia coli*. *Free Radic. Biol. Med.*  
824 **21**, 117–121 (1996).
- 825 53. Zhang, Y. *et al.* Antimicrobial blue light therapy for multidrug-resistant  
826 *Acinetobacter baumannii* infection in a mouse burn model: Implications for  
827 prophylaxis and treatment of combat-related wound infections. *J. Infect. Dis.*  
828 **209**, 1963–1971 (2014).

- 829 54. Mussi, M. A. *et al.* The Opportunistic Human Pathogen *Acinetobacter baumannii*  
830 Senses and Responds to Light. *J. Bacteriol.* **192**, 6336–6345 (2010).
- 831 55. Golic, A. *et al.* Staring at the Cold Sun: Blue Light Regulation Is Distributed within  
832 the Genus *Acinetobacter*. *PLoS One* **8**, e55059 (2013).
- 833 56. Kim, P. S. *et al.* *Acinetobacter apis* sp. nov., isolated from the intestinal tract of  
834 a honey bee, *Apis mellifera*. *J. Microbiol.* **52**, 639–645 (2014).
- 835 57. Kehl-Fie, T. E. *et al.* Nutrient metal sequestration by calprotectin inhibits  
836 bacterial superoxide defense, enhancing neutrophil killing of *Staphylococcus*  
837 *aureus*. *Cell Host Microbe* **10**, 158–164 (2011).
- 838 58. Mateo-Estrada, V., Graña-Miraglia, L., López-Leal, G., Castillo-Ramírez, S. &  
839 Delaye, L. Phylogenomics Reveals Clear Cases of Misclassification and Genus-  
840 Wide Phylogenetic Markers for *Acinetobacter*. *Genome Biol. Evol.* **11**, 2531–  
841 2541 (2019).
- 842 59. Antunes, L. C. S., Imperi, F., Towner, K. J. & Visca, P. Genome-assisted  
843 identification of putative iron-utilization genes in *Acinetobacter baumannii* and  
844 their distribution among a genotypically diverse collection of clinical isolates.  
845 *Res. Microbiol.* **162**, 279–284 (2011).
- 846 60. Runci, F. *et al.* Contribution of Active Iron Uptake to *Acinetobacter baumannii*  
847 Pathogenicity. *Infect. Immun.* **87**, (2019).
- 848 61. Nigro, S. J. & Hall, R. M. *GIsul2*, a genomic island carrying the *sul2*  
849 sulphonamide resistance gene and the small mobile element CR2 found in the  
850 *Enterobacter cloacae* subspecies *cloacae* type strain ATCC 13047 from 1890,  
851 *Shigella flexneri* ATCC 700930 from 1954 and *Acinetobacter baumannii* ATCC  
852 17978 from 1951. *J. Antimicrob. Chemother.* **66**, 2175–2176 (2011).
- 853 62. Hamidian, M. & Hall, R. M. *Acinetobacter baumannii* ATCC 19606 Carries  
854 *GIsul2* in a Genomic Island Located in the Chromosome. *Antimicrob. Agents*  
855 *Chemother.* **61**, (2017).
- 856 63. Shin, B., Park, C. & Park, W. Stress responses linked to antimicrobial resistance  
857 in *Acinetobacter* species. *Appl. Microbiol. Biotechnol.* **104**, 1423–1435 (2020).
- 858 64. Jin, J. S. *et al.* *Acinetobacter baumannii* Secretes Cytotoxic Outer Membrane  
859 Protein A via Outer Membrane Vesicles. *PLoS One* **6**, e17027 (2011).

860

861

## 862 FIGURES AND FIGURE LEGENDS

863

864

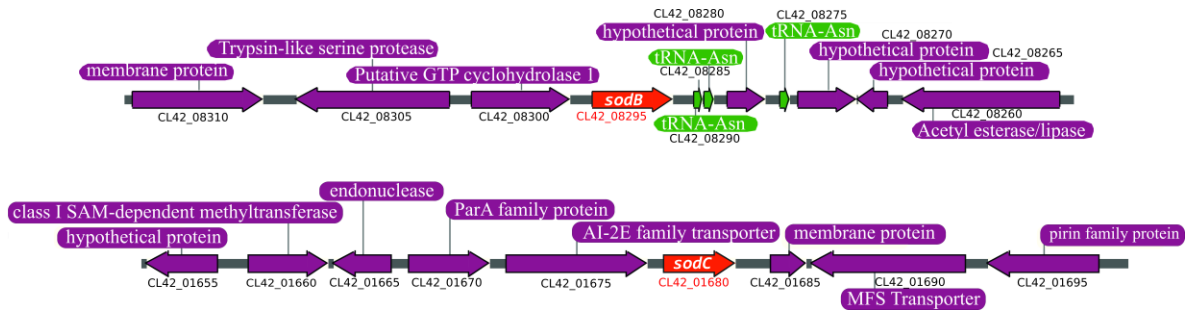

865

866 **Figure 1. Environment of *sod* genes in *Acinetobacter sp. Ver3*.** Schematic  
867 representation of the *Acinetobacter sp. Ver3* *sodB* (up) and *sodC* (down) loci, present  
868 in contigs JFYL01000023 and JFYL01000003, respectively. *sod* genes are shown in  
869 red while proximal genes are displayed in purple. The locus tag is provided below each  
870 gene. Three tRNAs (green) are encoded in the *sodB* region.

871

872

873

874

875

876

877



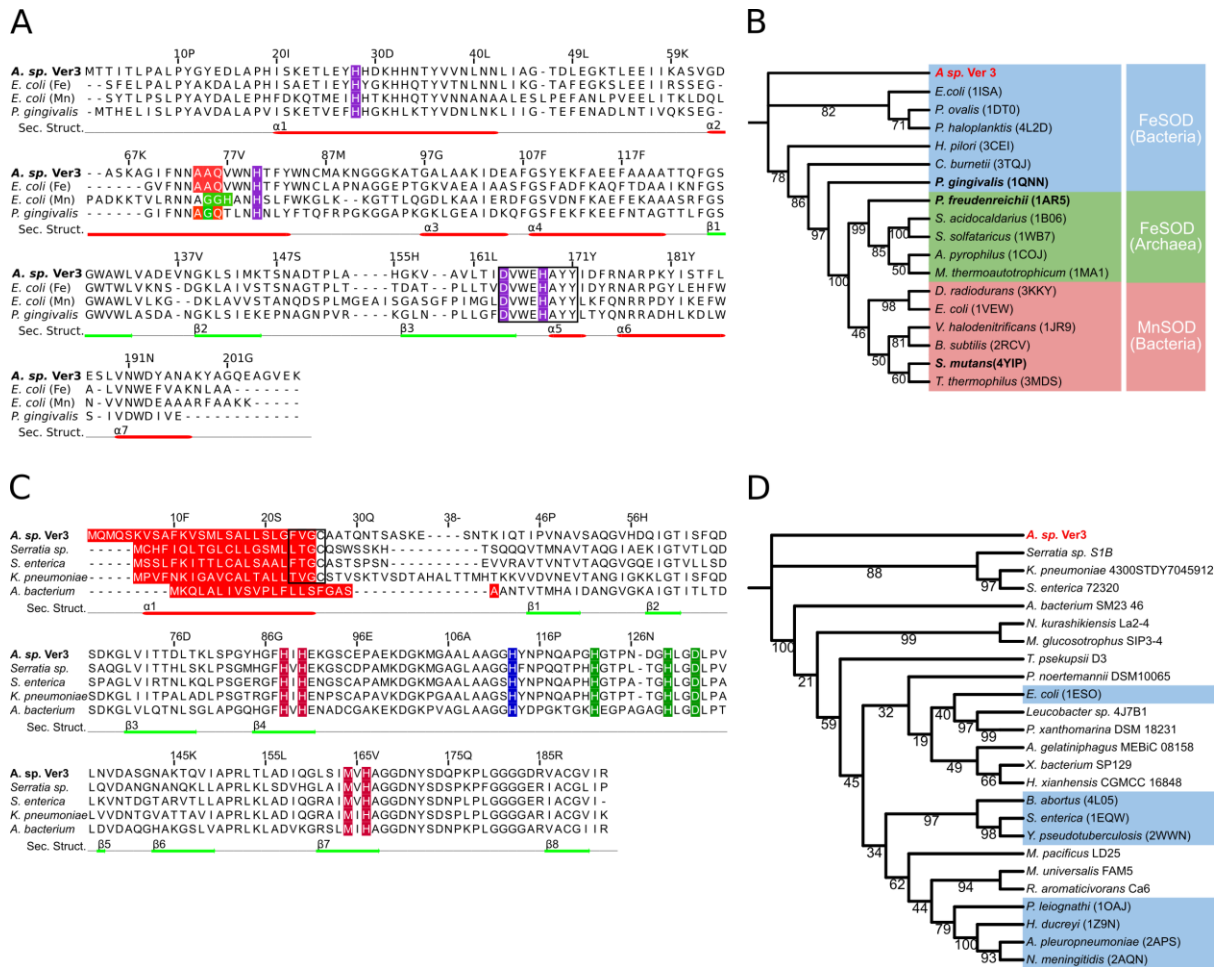

878

879 **Figure 2. Sequence alignment and phylogenetic analysis of SOD enzymes.** (A)  
 880 Sequence alignment of FeSOD enzymes from selected species. Amino acids  
 881 highlighted in purple correspond to conserved metal ligands. The motifs AAQ and  
 882 GGH (in MnSODs, the *E. coli* enzyme is shown for comparison) are shown in red and  
 883 green, respectively; the motif DVWEHAYIID comprising metal binding residues is  
 884 boxed. Secondary structure elements observed in the crystal structure of <sup>AV3</sup>SodB are  
 885 depicted as red and green lines below the sequence alignment. (B) Phylogenetic tree  
 886 of Fe-MnSODs of known structure. A clade of MnSODs (red) and two of FeSODs (blue  
 887 and green) are distinguished. Cambialistics Fe/MnSODs are in bold. (C) Sequence  
 888 alignment of CuZnSOD enzymes from selected species. Conserved metal ligands are  
 889 shown in colour: copper ligands in vermilion, zinc ligands in green and a histidine  
 890 residue that coordinates both metal ions in blue. Predicted signal peptides are  
 891 signalled in red and lipobox sequences are boxed. Secondary structure elements  
 892 predicted by Jalview<sup>36</sup> are depicted as red and green lines below the sequence  
 893 alignment. (D) Phylogenetic tree built for CuZnSOD sequences retrieved from the  
 894 NCBI or the PDB (light blue boxes). Note that the signal peptide was removed from  
 895 each sequence prior to alignment. Trees were constructed using the Maximum  
 896 Likelihood algorithm; the robustness of the major branching points is indicated by the  
 897 bootstrap values (10,000 repetitions).

898

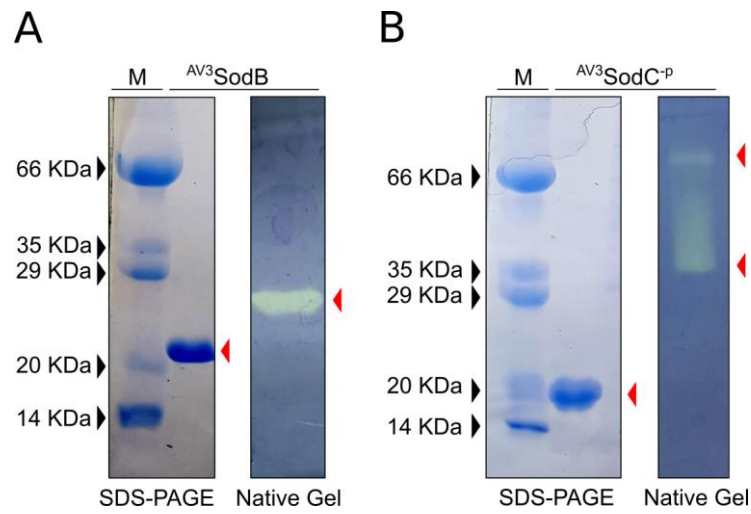

899

900 **Figure 3. Recombinant *Acinetobacter sp. Ver3* SODs.** As isolated <sup>AV3</sup>SodB (A) and  
901 <sup>AV3</sup>SodC<sup>-P</sup> (B) were analysed by SDS-PAGE and Coomassie Blue staining (left  
902 panels). SOD activity was revealed *in situ* in nondenaturing polyacrylamide gels (right  
903 panels). M: molecular weight marker.

904

905

906

907

908

909

910

911

912

913

914

915

916

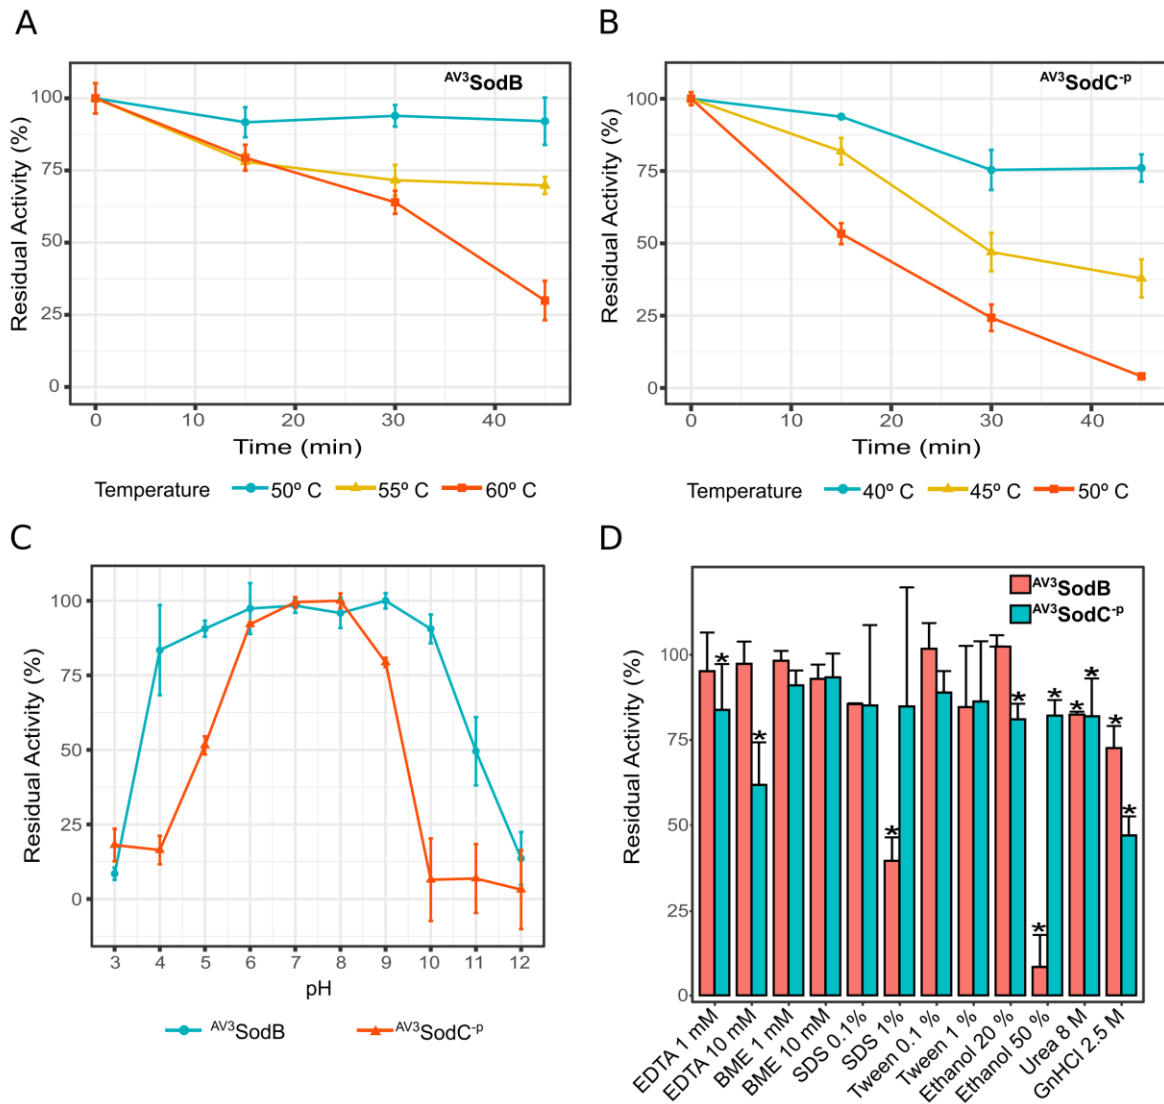

917

918 **Figure 4. Biochemical characterization of *Acinetobacter* sp. Ver3 SODs.**

919 Thermostability of  $AV^3SodB$  (A) and  $AV^3SodC^P$  (B). In each case, the residual SOD  
 920 activity was measured after different heat treatments. (C) pH tolerance of  $AV^3SodB$   
 921 (blue line) and  $AV^3SodC^P$  (red line). In each case, the residual SOD activity was  
 922 measured at pH 7.8 after incubating the enzyme 1 h at 25° C in buffers with different  
 923 pH values. (D) Effect of diverse chemical agents on  $AV^3SOD$  and  $AV^3SodC^P$  activity. In  
 924 each case, the residual SOD activity was measured after incubating the enzyme 1 h  
 925 at 25° C with the compound. In all experiments, SOD activity was determined  
 926 spectrophotometrically by inhibition of the xanthine/xanthine oxidase-induced  
 927 reduction of cytochrome *c*, at 25° C; the activity of the untreated enzyme was defined  
 928 as 100%. The reported values correspond to the mean of four measurements in three  
 929 replicates of the experiment; bars indicate standard deviations.

930

931

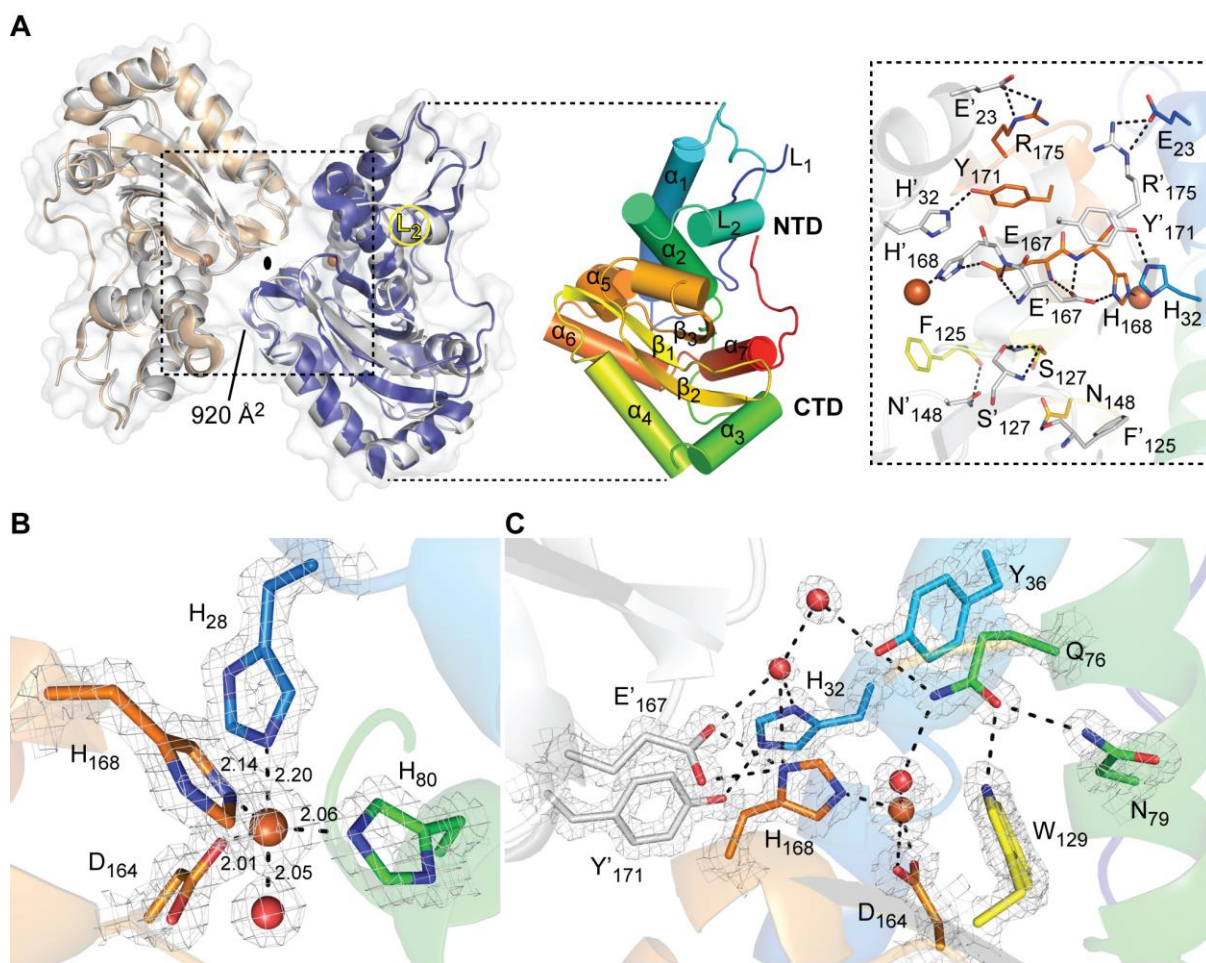

932

933 **Figure 5. Crystal structure of  $AV^3SodB$ .** (A) Although there is a single molecule of  
 934  $AV^3SodB$  per asymmetric unit, two contiguous molecules (in beige and blue, the  
 935 interface area between them is informed in  $\text{\AA}^2$ ) related by crystallographic symmetry  
 936 (oval symbol) give rise to a dimer of the protein which presents a quaternary structure  
 937 similar to that observed for the *E. coli* FeSOD (PDB code 1ISA, in Gray, superimposed  
 938 to  $AV^3SodB$ ) (on the left). Proteins are shown in ribbon representation. The surface of  
 939  $AV^3SodB$  is depicted in gray. On the right, a monomer of  $AV^3SodB$  is shown in rainbow  
 940 colours, with helices represented as cylinders. Secondary structure elements  
 941 conserved in FeSODs are indicated (see also Fig. 2A). NTD, N-terminal domain; CTD,  
 942 C-terminal domain. An inset of the interface between  $AV^3SodB$  molecules in a protein  
 943 dimer is shown. Residues involved in intermolecular hydrogen bonds or salt bridges  
 944 are depicted in stick representation. Iron ions are shown in this and subsequent panels  
 945 as orange spheres. (B) Active site of  $AV^3SodB$ . Metal ligands are represented as sticks.  
 946 Interatomic distances are informed (in  $\text{\AA}$ ). One of the axial ligands is a water molecule  
 947 (red sphere). (C) A conserved network of hydrogen bonds involving active site  
 948 residues. Interatomic interactions are depicted as dashed lines. The mesh in panels  
 949 (B) and (C) corresponds to the crystallographic  $2mFo-DC$  electron density map  
 950 contoured to  $2.0 \sigma$ .

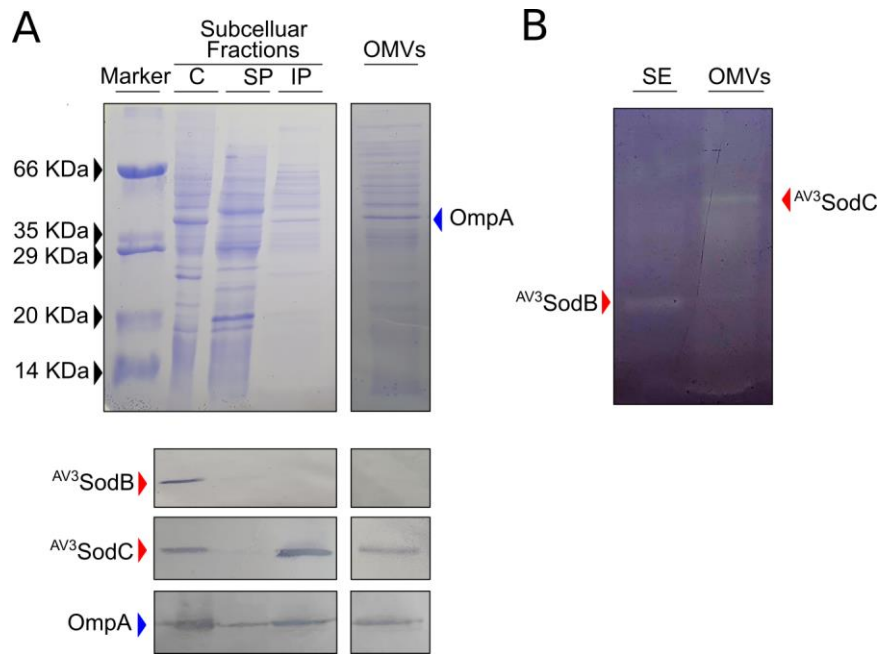

951

952 **Figure 6.  $AV^3$ SodB and  $AV^3$ SodC subcellular localization.** (A) Coomassie stained  
953 SDS-PAGE (upper panel) and Western Blot assay (lower panel) of cytosolic (C),  
954 soluble and insoluble periplasmic (SP and IP, respectively) fractions (7  $\mu$ g of total  
955 proteins), and OMVs (15  $\mu$ L from a 500X culture concentrate) obtained from  
956 *Acinetobacter* sp. Ver3. Specific antibodies raised against  $AV^3$ SodB and  $AV^3$ SodC (red  
957 arrows) were used. The detection of OmpA (blue arrow) with specific antibodies  
958 against the *A. baumannii* protein was used as a control; OmpA has been shown to be  
959 loaded into OMVs<sup>64</sup>. (B) In-gel assessment of SOD activity present in a soluble extract  
960 (SE) (1.5  $\mu$ g of total proteins) and OMVs (15  $\mu$ L from a 500X culture concentrate) of  
961 *Acinetobacter* sp. Ver3.

962

963

964

965

966

967

968

969

970

971

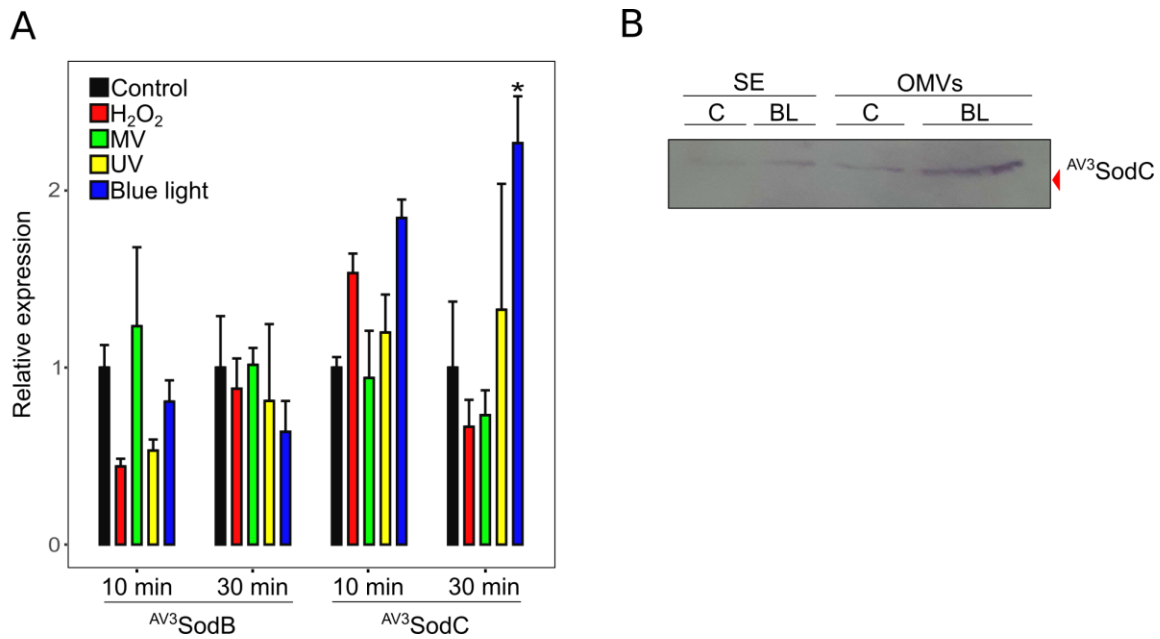

972

973 **Figure 7. *sodB* and *sodC* response to pro-oxidant challenges.** (A) Relative levels  
974 of *sodB* and *sodC* transcription in untreated *Acinetobacter sp. Ver3* cells (black bars)  
975 or after exposure to 1 mM H<sub>2</sub>O<sub>2</sub> (red bars), 0.5 mM Methyl Viologen (MV) (green bars),  
976 900 J.m<sup>-2</sup> ultraviolet (UV) (yellow bars) or blue light (blue bars). The mean for the  
977 housekeeping genes *recA* and *rpoB* was used as a normalizer. Asterisks indicate  
978 significant differences among control and treated samples, as determined by analysis  
979 of variance (ANOVA) and Tukey's multiple comparison test. In each case, the average  
980 value and the standard deviation of four biological replicates are shown. (B) Anti-  
981 AV<sup>3</sup>SodC immunoblot of a soluble extract (SE, 7 µg of total proteins) and OMVs (15 µL  
982 from a 500X culture concentrate) of *Acinetobacter sp. Ver3* grown over 26 h in the  
983 presence of blue light (BL, 5 µmol.m<sup>-2</sup>.s<sup>-1</sup>). A control (C) culture was also included.

984

985

986

987

988

989

990

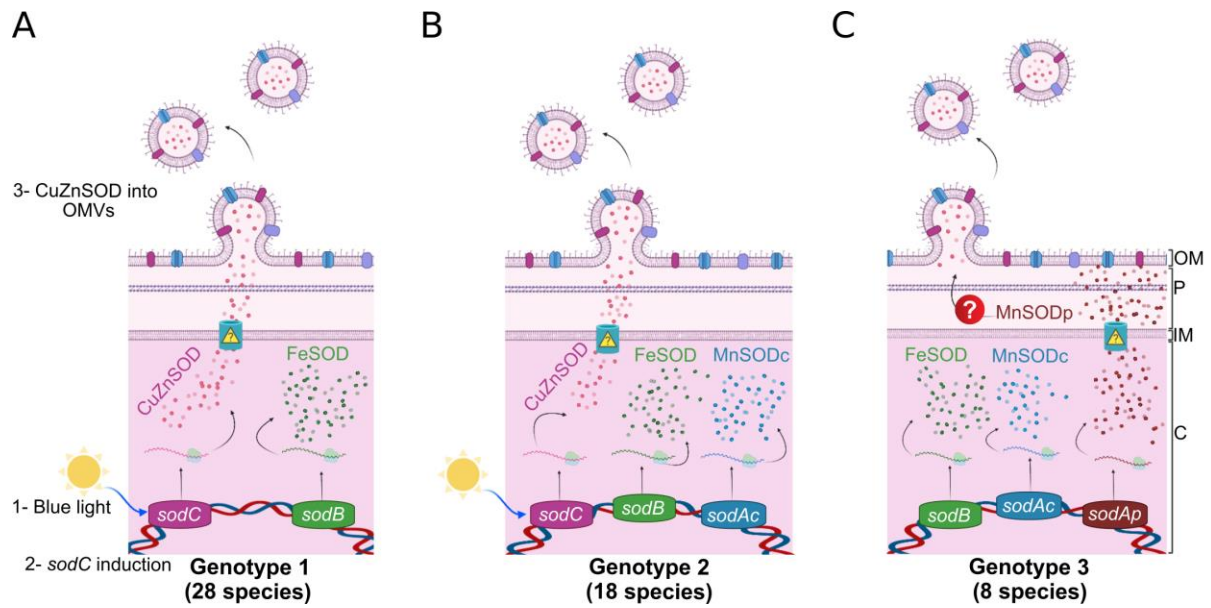

**Figure 8. Proposed model schematizing the subcellular localization of SODs encoded by *Acinetobacter* spp. according to their genotype.** (A) Strains with a type 1 genotype harbour *sodB* and *sodC* genes, coding for a FeSOD and a CuZnSOD, which are located in the cytosolic (C) and periplasmic (P) spaces, respectively. The CuZnSOD could also be loaded into OMVs, as shown for *Acinetobacter* sp. Ver3 strain. (B) Strains with a type 2 genotype additionally harbour a *sodAc* gene, coding for a cytosolic MnSOD (cMnSOD). (C) Strains with a type 3 genotype bear *sodB* and *sodAp* genes, coding for a FeSOD and a periplasmic MnSOD (pMnSOD), respectively. In 12 out of the 19 strains in this group, a *sodAc* gene is also present. \*One strain of *A. beijerinckii* is present in each of these groups. IM: inner membrane; OM: outer membrane.

1009 **Table 1. X-ray diffraction data collection and refinement statistics.**

|                                                     | <b>AV<sup>3</sup>SodB<br/>(PDB 7SBH)</b> |
|-----------------------------------------------------|------------------------------------------|
| <b>Data collection</b>                              |                                          |
| Space group                                         | C222 <sub>1</sub>                        |
| Cell dimensions                                     |                                          |
| <i>a</i> , <i>b</i> , <i>c</i> (Å)                  | 70.93 87.02 75.61                        |
| $\alpha$ , $\beta$ , $\gamma$ (°)                   | 90.00 90.00 90.00                        |
| Resolution range (Å)                                | 28.54 - 1.34 (1.37 - 1.34)               |
| <i>R</i> <sub>merge</sub>                           | 0.062 (0.749)                            |
| <i>R</i> <sub>pim</sub>                             | 0.026 (0.360)                            |
| <i>I</i> / $\sigma$ <i>I</i>                        | 18.9 (2.4)                               |
| Completeness (%)                                    | 99.7 (94.1)                              |
| Multiplicity                                        | 6.6 (5.1)                                |
| <b>Refinement</b>                                   |                                          |
| Resolution (Å)                                      | 26.85 - 1.345 (1.393 - 1.345)            |
| No. reflections                                     | 51,972 (4,958)                           |
| <i>R</i> <sub>work</sub> / <i>R</i> <sub>free</sub> | 0.144/0.162                              |
| Protein residues                                    | 208                                      |
| Ligand molecules                                    | 2                                        |
| No. atoms                                           | 2,050                                    |
| Protein                                             | 1,666                                    |
| Ligands                                             | 32                                       |
| Water                                               | 352                                      |
| Wilson B-factor (Å <sup>2</sup> )                   | 12.96                                    |
| Average B-factors (Å <sup>2</sup> )                 | 17.96                                    |
| Protein                                             | 14.93                                    |
| Ligands                                             | 42.79                                    |
| Water                                               | 30.09                                    |
| R.m.s. deviations                                   |                                          |
| Bond lengths (Å)                                    | 0.012                                    |
| Bond angles (°)                                     | 1.15                                     |
| Ramachandran                                        |                                          |
| Favoured (%)                                        | 97.57                                    |
| Allowed (%)                                         | 2.43                                     |
| Outliers (%)                                        | 0                                        |

1010

1011 One protein crystal was employed for structure determination. Values in parentheses  
1012 are for the highest-resolution shell.

1013

1014



1015 **Table 2. Prevalence of *sod* genes in the genus *Acinetobacter*.**

| Organism                            | No. strains | <i>sodB</i> | <i>soda</i> | <i>sodC</i> | Genotype | % In database |
|-------------------------------------|-------------|-------------|-------------|-------------|----------|---------------|
| <i>Acinetobacter albensis</i>       | 1           | 1           | 0           | 1           | 1        | 83,4          |
| <i>Acinetobacter baumannii</i> *    | 163         | 1           | 0           | 1           |          |               |
| <i>Acinetobacter bohemicus</i>      | 2           | 1           | 0           | 1           |          |               |
| <i>Acinetobacter bouvetii</i>       | 2           | 1           | 0           | 1           |          |               |
| <i>Acinetobacter brisouii</i>       | 2           | 1           | 0           | 1           |          |               |
| <i>Acinetobacter calcoaceticus</i>  | 2           | 1           | 0           | 1           |          |               |
| <i>Acinetobacter cumulans</i>       | 1           | 1           | 0           | 1           |          |               |
| <i>Acinetobacter defluvii</i>       | 1           | 1           | 0           | 1           |          |               |
| <i>Acinetobacter gandensis</i>      | 2           | 1           | 0           | 1           |          |               |
| <i>Acinetobacter genomosp.</i>      | 3           | 1           | 0           | 1           |          |               |
| <i>Acinetobacter gernerii</i>       | 1           | 1           | 0           | 1           |          |               |
| <i>Acinetobacter harbinensis</i>    | 1           | 1           | 0           | 1           |          |               |
| <i>Acinetobacter indicus</i>        | 7           | 1           | 0           | 1           |          |               |
| <i>Acinetobacter kookii</i>         | 1           | 1           | 0           | 1           |          |               |
| <i>Acinetobacter kyonggiensis</i>   | 1           | 1           | 0           | 1           |          |               |
| <i>Acinetobacter lactucae</i>       | 1           | 1           | 0           | 1           |          |               |
| <i>Acinetobacter nosocomialis</i>   | 14          | 1           | 0           | 1           |          |               |
| <i>Acinetobacter oleivorans</i>     | 1           | 1           | 0           | 1           |          |               |
| <i>Acinetobacter parvus</i>         | 3           | 1           | 0           | 1           |          |               |
| <i>Acinetobacter piscicola</i>      | 1           | 1           | 0           | 1           |          |               |
| <i>Acinetobacter pittii</i>         | 22          | 1           | 0           | 1           |          |               |
| <i>Acinetobacter pragensis</i>      | 1           | 1           | 0           | 1           |          |               |
| <i>Acinetobacter radioresistens</i> | 4           | 1           | 0           | 1           |          |               |
| <i>Acinetobacter rudis</i>          | 1           | 1           | 0           | 1           |          |               |
| <i>Acinetobacter schindleri</i>     | 3           | 1           | 0           | 1           |          |               |
| <i>Acinetobacter seifertii</i>      | 4           | 1           | 0           | 1           |          |               |
| <i>Acinetobacter sp.</i>            | 14          | 1           | 0           | 1           |          |               |

|                                         |   |   |   |   |   |      |
|-----------------------------------------|---|---|---|---|---|------|
| <i>Acinetobacter tjernbergiae</i>       | 1 | 1 | 0 | 1 |   |      |
| <i>Acinetobacter towneri</i>            | 1 | 1 | 0 | 1 |   |      |
| <i>Acinetobacter venetianus</i>         | 1 | 1 | 0 | 1 |   |      |
| <i>Acinetobacter beijerinckii</i>       | 1 | 1 | 1 | 1 |   |      |
| <i>Acinetobacter bereziniae</i>         | 1 | 1 | 2 | 1 |   |      |
| <i>Acinetobacter colistiniresistens</i> | 3 | 1 | 1 | 1 |   |      |
| <i>Acinetobacter dispersus</i>          | 1 | 1 | 1 | 1 |   |      |
| <i>Acinetobacter equi</i>               | 1 | 1 | 1 | 1 |   |      |
| <i>Acinetobacter guillouiae</i>         | 1 | 1 | 1 | 1 |   |      |
| <i>Acinetobacter gyllenbergii</i>       | 1 | 1 | 1 | 1 |   |      |
| <i>Acinetobacter idrijaensis</i>        | 1 | 1 | 1 | 1 |   |      |
| <i>Acinetobacter johnsonii</i>          | 5 | 1 | 1 | 1 |   |      |
| <i>Acinetobacter junii</i>              | 3 | 1 | 1 | 1 | 2 | 10,2 |
| <i>Acinetobacter lwoffii</i>            | 1 | 1 | 1 | 1 |   |      |
| <i>Acinetobacter marinus</i>            | 1 | 1 | 1 | 1 |   |      |
| <i>Acinetobacter nectaris</i>           | 1 | 1 | 1 | 1 |   |      |
| <i>Acinetobacter proteolyticus</i>      | 1 | 1 | 1 | 1 |   |      |
| <i>Acinetobacter puyangensis</i>        | 1 | 1 | 1 | 1 |   |      |
| <i>Acinetobacter sp.</i>                | 3 | 1 | 1 | 1 |   |      |
| <i>Acinetobacter tandoii</i>            | 1 | 1 | 1 | 1 |   |      |
| <i>Acinetobacter variabilis</i>         | 3 | 1 | 1 | 1 |   |      |
| <i>Acinetobacter wuhouensis</i>         | 2 | 1 | 1 | 1 |   |      |
| <i>Acinetobacter baylyi ADP1</i>        | 1 | 1 | 2 | 0 |   |      |
| <i>Acinetobacter beijerinckii</i>       | 1 | 1 | 1 | 0 |   |      |
| <i>Acinetobacter haemolyticus</i>       | 7 | 1 | 2 | 0 |   |      |
| <i>Acinetobacter haemolyticus</i>       | 4 | 1 | 1 | 0 | 3 | 6,1  |
| <i>Acinetobacter halotolerans</i>       | 1 | 1 | 1 | 0 |   |      |
| <i>Acinetobacter qingfengensis</i>      | 2 | 1 | 2 | 0 |   |      |
| <i>Acinetobacter soli</i>               | 1 | 1 | 2 | 0 |   |      |

|                               |   |   |   |   |     |     |
|-------------------------------|---|---|---|---|-----|-----|
| <i>Acinetobacter ursingii</i> | 1 | 1 | 2 | 0 |     |     |
| <i>Acinetobacter sp.</i>      | 1 | 1 | 1 | 0 |     |     |
| <i>Acinetobacter apis</i>     | 1 | 0 | 1 | 1 | N/A | 0,3 |

1016

1017 \* *A. baumannii* strains 921, 3207 and 7835 encode a second *sodB* gene.

1018

## 1019 SUPPLEMENTARY TABLES

1020 **Table S1. Strains and plasmids used in this work.**

1021 **Table S2. Oligonucleotides used in this work.**

1022 **Table S3. Search of SODs encoded by *Acinetobacter spp.***

1023

## 1024 SUPPLEMENTARY FIGURES

1025 **Figure S1. A FMN binding site in <sup>AV3</sup>SodB.**

1026 **Figure S2. Sequence alignment of MnSODs in *Acinetobacter spp.***

1027 **Figure S3. Genomic localization of the *sodB2* gene.**

1028
